1 **Integration of Elemental Imaging and Spatial Transcriptomic Profiling for Proof-of-**  
2 **Concept Metals-Based Pathway Analysis of Colon Tumor Microenvironment**

3 Aruesha Srivastava<sup>1</sup>, Neha Shaik<sup>2</sup>, Yunrui Lu<sup>1</sup>, Matthew Chan<sup>3</sup>, Alos Diallo<sup>3,4</sup>, Serin Han<sup>5</sup>, Tracy  
4 Punshon<sup>6,7</sup>, Brian Jackson<sup>7,8</sup>, Linda Vahdat<sup>9</sup>, Xiaoying Liu<sup>5</sup>, Vivek Mittal<sup>10,11</sup>, Ken Lau<sup>12</sup>, Jiang  
5 Gui<sup>13</sup>, Louis Vaickus<sup>5</sup>, Jack Hoopes<sup>14,15</sup>, Fred Kolling<sup>16</sup>, Laurent Perreard<sup>16</sup>, Jonathan Marotti<sup>5</sup>,  
6 Joshua Levy<sup>17,18,\*</sup>

7  
8 **Affiliations:**

- 9 1. California Institute of Technology, Pasadena, CA
- 10 2. Cupertino High School, Cupertino, CA
- 11 3. Program in Quantitative Biomedical Sciences, Dartmouth College Geisel School of  
12 Medicine, Lebanon, NH
- 13 4. Department of Epidemiology, Dartmouth College Geisel School of Medicine, Hanover,  
14 NH
- 15 5. Emerging Diagnostic and Investigative Technologies, Department of Pathology and  
16 Laboratory Medicine, Dartmouth Health, Lebanon, NH
- 17 6. Department of Biological Sciences, Dartmouth College, Hanover, NH
- 18 7. Trace Element Analysis Core, Biomedical National Elemental Imaging Resource,  
19 Dartmouth Cancer Center, Lebanon, NH
- 20 8. Department of Earth Sciences, Dartmouth College, Hanover, NH
- 21 9. Department of Medicine, Dartmouth Health, Lebanon, NH
- 22 10. Department of Cell and Developmental Biology, Weill Cornell Medical College, New York  
23 City, NY
- 24 11. Department of Cardiothoracic Surgery, Weill Cornell Medical College, New York City, NY
- 25 12. Department of Cell and Developmental Biology, Vanderbilt University, Nashville, TN
- 26 13. Department of Biostatistics, Dartmouth College Geisel School of Medicine, Hanover, NH
- 27 14. Department of Radiation Oncology, Dartmouth Health, Lebanon, NH
- 28 15. Department of Surgery, Dartmouth Health, Lebanon, NH
- 29 16. Genomics Shared Resource, Dartmouth Cancer Center, Lebanon, NH
- 30 17. Department of Pathology and Laboratory Medicine, Cedars Sinai Medical Center, Los  
31 Angeles, CA
- 32 18. Department of Computational Biomedicine, Cedars Sinai Medical Center, Los Angeles,  
33 CA

34  
35 \*To whom correspondence should be addressed: [joshua.levy@cshs.org](mailto:joshua.levy@cshs.org)  
36

37 **Abstract**

38 The complex interplay between metal abundance, transport mechanisms, cell distribution, and  
39 tumor progression-related biological pathways (e.g., metabolism, collagen remodeling) remains  
40 poorly understood. Traditionally, genes and metals have been studied in isolation, limiting  
41 insights into their interactions. Recent advances in spatial transcriptomics and elemental  
42 profiling now enable comprehensive exploration of tissue-wide metal-gene interactions, though  
43 integration remains challenging. In this proof-of-concept study, we investigated metal-dependent  
44 signaling within the tumor microenvironment of a unique colorectal cancer (CRC) tumor. We  
45 implemented a spatial multimodal workflow which integrated elemental imaging, gene  
46 expression, cellular composition, and histopathological features to uncover metals-related  
47 pathways through spatially resolved differential expression analysis. Preliminary findings  
48 revealed significant associations, for instance: elevated iron correlated with mesenchymal  
49 phenotypes located at the tumor's proliferative front, reflecting epithelial-to-mesenchymal  
50 transition pathways, and extracellular matrix remodeling. High concentrations of copper were  
51 predominantly localized in regions of active tumor growth and associated with the upregulation  
52 of immune response genes. This proof-of-concept workflow demonstrates the feasibility of  
53 integrating elemental imaging with spatial transcriptomics to identify metals-based gene  
54 correlates. Future application of this workflow to larger patient cohorts will pave the way for  
55 expansive comparisons across the metallome and transcriptome, ultimately identifying novel  
56 targets for tumor progression biomarkers and therapeutic interventions.

57  
58  
59  
60  
61  
62

## 63 **Background and Introduction**

64 Colorectal Cancer (CRC) represents a significant global health challenge, accounting for nearly  
65 10% of all cancer cases and ranking as the second-leading cause of cancer-related deaths  
66 worldwide <sup>1</sup>. The rising incidence of CRC among younger demographics underscores an urgent  
67 need to advance screening, prognostic tools, and therapeutic approaches <sup>2,3</sup>. Central to  
68 improving outcomes is a deeper understanding of the mechanisms underlying tumor  
69 progression and metastasis, which are responsible for approximately 90% of cancer mortalities  
70 and associated with sharply declining survival rates at advanced stages.

71  
72 Elements significantly influence cancer progression through roles in cell proliferation, invasion,  
73 motility, adhesion, and more <sup>4-6</sup>. Metals such as copper (Cu), iron (Fe), and zinc (Zn) are vital  
74 for enzymatic reactions essential for mitochondrial respiration, DNA repair, senescence, and  
75 immune regulation <sup>7-18</sup>. Metals also modulate signaling pathways through metalloallostery,  
76 influencing nutrient sensing and protein regulation. Elevated levels of Cu and Fe can also  
77 contribute to reactive oxygen species (ROS) production, which promotes angiogenesis and  
78 disrupts DNA repair, enhancing tumor invasion and metastasis <sup>15,19,20</sup>. The interplay between  
79 various essential and non-essential elements is integral to tumor growth and metastasis, and  
80 research into these interactions and their biological function will provide insights into element-  
81 dependent vulnerabilities, offering potential targets for novel therapeutic interventions. For  
82 instance, a recent Phase II trial with tetrathiomolybdate (TM), a Cu chelator, demonstrated  
83 promising results in improving progression-free and overall survival rates for breast cancer  
84 patients at high risk of metastasis <sup>21-23</sup>. TPEN, another Cu chelator, selectively targets CRC  
85 cells due to their higher Cu accumulation <sup>12,17</sup>. Despite advances in metal-based diagnostics and  
86 therapies, their clinical application faces significant challenges due to incomplete understanding  
87 of how metals are distributed within tumors and their specific roles in intra- and inter-cellular  
88 signaling within the tumor microenvironment (TME). The complexity of elemental distribution,

89 influenced by factors such as dietary intake and unique cellular uptake and export mechanisms,  
90 results in a dynamic and heterogeneous metal landscape within tumors<sup>24–26</sup>. This complexity is  
91 further exacerbated by the presence of metals in various cellular pools, ranging from tightly  
92 bound to more labile forms that interact with small molecules<sup>27</sup>.

93

94 A deeper understanding of metal distribution within tumors has been traditionally limited by bulk  
95 analysis methods, which overlook the nuanced spatial distribution of metals crucial for  
96 understanding their role in cancer pathogenesis. High-resolution elemental imaging (EI) such as  
97 Laser Ablation Inductively Coupled Plasma Time of Flight Mass Spectrometry (LA-ICP-TOF-  
98 MS) offers a significant breakthrough by providing precise localization of metal accumulation.  
99 This technology enables detailed mapping of metal pools within the tumor landscape, revealing  
100 its potential influence on cancer progression and patient outcomes. It holds the potential to  
101 revolutionize cancer diagnosis and treatment by identifying unique multi-element signatures  
102 indicative of tumor states.

103

104 Complementing this, recent technological advances in spatial transcriptomics (ST) enable high-  
105 resolution<sup>28</sup>, untargeted spatial expression profiling of almost all protein-coding genes,  
106 providing insights into the genetic factors governing metal transport and their toxicological  
107 implications<sup>29</sup>. The conserved nature of metal transport proteins across species underscores  
108 the relevance of these genetic studies. ST overcomes the limitations of bulk analysis, which can  
109 obscure tissue-specific relationships, and of multiplexing assays, which are restricted to a  
110 limited number of protein candidates<sup>30–38</sup>. By allowing for the profiling of the entire  
111 transcriptome at high spatial resolution, including at the single-cell level, ST can potentially be  
112 leveraged to pinpoint specific cellular interactions or markers of tumor progression.

113



114 The spatial location and abundance of essential elements within tissues reflect complex  
115 processes of availability, homeostasis, and biological necessity. For instance, the homeostasis  
116 of essential elements involves a myriad of proteins that sense, signal, chaperone, and control  
117 their movement<sup>39,40</sup>. Thus, integrating spatial transcriptomics and elemental imaging  
118 technologies has the potential to reveal intricate metal-biomolecular interactions that may be  
119 missed by traditional reductionist approaches that would analyze each assay in isolation<sup>41</sup>. Yet,  
120 the absence of dedicated software platforms specifically designed for such integrative tasks has  
121 been a significant obstacle, explaining, in part, why comprehensive pathway analysis for metals  
122 in cancer remains an unrealized goal to date<sup>42-45</sup>.

123

124 To address this gap, the Biomedical National Elemental Imaging Resource (BNEIR) developed  
125 TRACE (Tissue Region Analysis through Co-registration of Elemental Maps), co-registration  
126 software that facilitates the spatial integration of elemental imaging data with histopathology,  
127 immunohistochemistry/multiplex immunofluorescence, and spatial transcriptomics technologies  
128 (**Figure 1**)<sup>41,46,47</sup>. This exploratory proof-of-concept study builds on TRACE-enabled integration  
129 to further characterize elemental and transcriptomic data from the primary tumor of a single  
130 colorectal cancer (CRC) case.

131

132 Through a multimodal analysis, we aim to demonstrate the potential for uncovering valuable  
133 insights into the interplay between genetic and elemental landscapes in cancer pathology,  
134 paving the way for a more comprehensive understanding of CRC progression. The primary  
135 objectives of this study are twofold: firstly, to identify correlations between gene signatures and  
136 metal abundance within specific cellular architectures and cell types in CRC; secondly, to  
137 leverage these insights to develop a metals-based pathway analysis. We believe this initial  
138 investigation will facilitate a more comprehensive exploration of metal-related pathways in  
139 cancer across larger cohorts, enhancing our understanding of pathogenesis, metastasis, and

140 progression (**Figure 1**). Ultimately, this research seeks to clarify the role of metal  
141 bioaccumulation in tumor dynamics, potentially leading to the discovery of novel biomarkers and  
142 the development of more effective therapeutic strategies.  
143

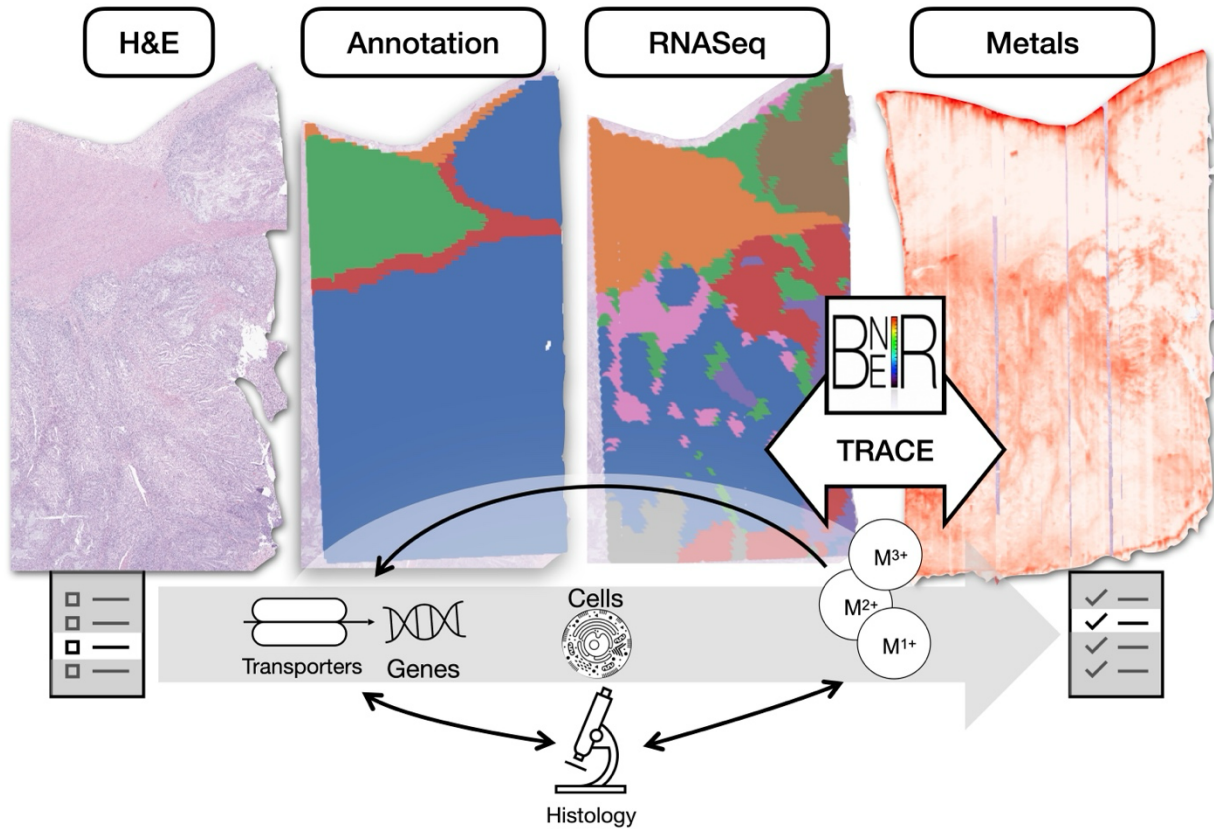

144  
145 **Figure 1: Overview:** Spatial Integration of Spatial Elemental Imaging and Spatial  
146 Transcriptomics can reveal genes associated with metal bioaccumulation within specific tissue  
147 architectures, shedding light on metals-related pathways and cellular changes associated with  
148 tumorigenesis; BNEIR: Biomedical National Elemental Imaging Resource; TRACE: Tissue  
149 Region Analysis through Co-registration of Elemental Maps

150

151

152

## 153 Results

### 154 Results Overview

155 We conducted a comprehensive “metals-based pathway analysis” on a primary tumor section  
156 from a CRC patient, aiming to uncover associations between the abundance of various metals  
157 and gene pathways within distinct tissue architectures. The primary tumor, originating in the

158 patient's cecum at pathologic T-stage 3 (indicating invasion through the muscularis propria),  
159 advanced to stage 2a lymph node involvement and metastasized to the liver. This section  
160 provides a concise overview as context for the subsequent findings:

- 161 1. **Spatial Transcriptomics (ST) Profiling:** Utilized the 10x Genomics Visium spatial  
162 transcriptomic (ST) CytAssist assay to capture spatial variations in the expression of  
163 approximately 18,000 genes across 55-micron spots. This was complemented by high-  
164 resolution 40X H&E-stained whole slide imaging (WSI; Leica Aperio GT450) on the  
165 same section.
- 166 2. **Spatial Elemental Imaging (EI):** A serial section was analyzed to profile all elements  
167 and their isotopes at 5-micron resolution using laser ablation inductively coupled plasma  
168 time-of-flight mass spectrometry (LA-ICPTOF-MS).
- 169 3. **Spatial Data Integration:** Achieved through TRACE (Tissue Region Analysis through  
170 Co-registration of Elemental Maps), which facilitated the spatial alignment of ST and EI  
171 data.
- 172 4. **Pathologist annotations:** Annotated WSI identified regions inside, around, and away  
173 from the tumor, among other tissue architectures such as epithelium, serosa, and  
174 subcutaneous fat.
- 175 5. **Elemental Hotspot analysis:** Identifies hotspot areas of high and low metal abundance  
176 using Getis Ord\* statistics <sup>48</sup>.
- 177 6. **Cell Typing:** Integrated single cell RNASeq data from a serial section to characterize  
178 cell types within these hotspots.
- 179 7. **Differential Expression:** Conducted a transcriptome-wide comparison of gene  
180 expression in areas with varying metal abundance.
- 181 8. **Pathway Analysis:** Gene set enrichment analysis performed on statistically significant  
182 genes to elucidate the connections between metal abundance and various biological  
183 processes. Metal-gene correlations were also visualized across genes contained within

184 several select, relevant Cu homeostasis and tumor progression pathways for additional  
 185 context, as an example of how spatial data integration can recapitulate and expand on  
 186 known biological mechanisms and pathways.

187 **9. Factor/Interaction Analysis:** Employed machine learning and clustering approaches to  
 188 reveal distinct profiles of metals, genes, and cell types associated with different tissue  
 189 histologies.

190

191 **Identifying tissue architectural and cellular components associated with high elemental**  
 192 **abundance**

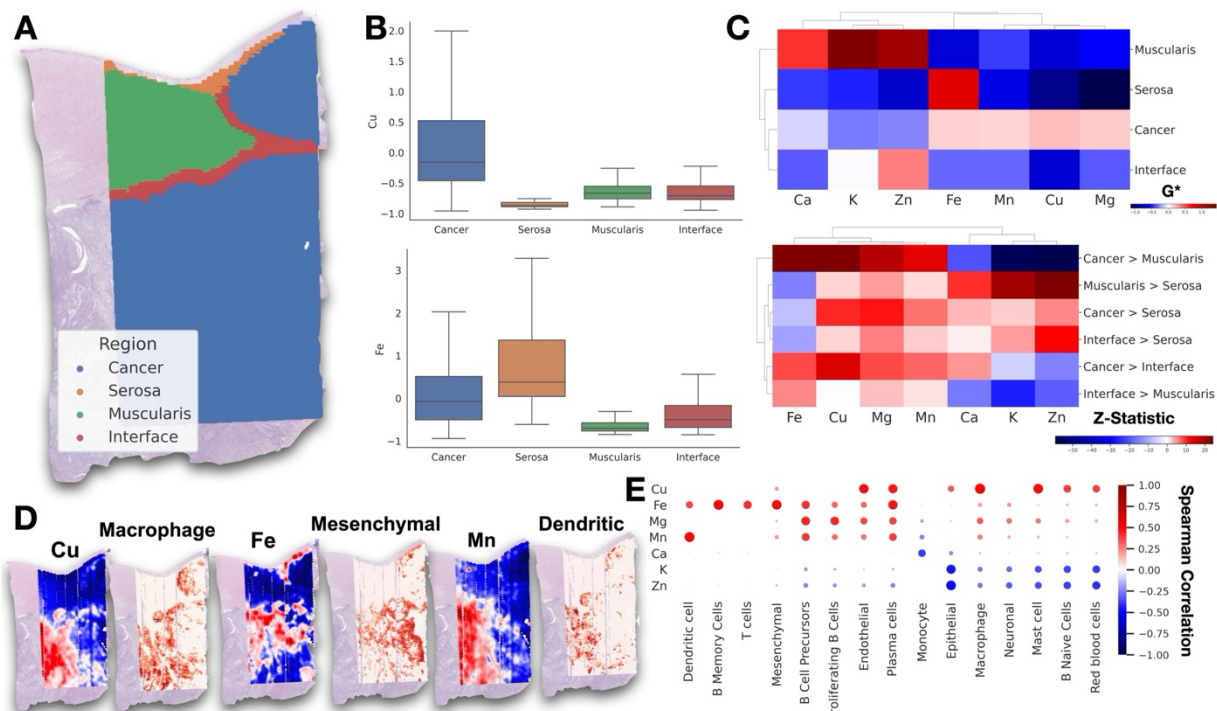

193 **Figure 2: Metal distribution in tissue architectures:** **A)** Pathologist annotation of tumor,  
 194 tumor interface, and surrounding musculature and serosa, **B)** Boxplot demonstrating differences  
 195 in  $G_i^*$  hotspot statistics across various tissue architectures, **C)** Clustered heatmaps comparing  
 196 average hotspot abundance ( $G_i^*$ ) by metal within select architectures and relative differences in  
 197 hotspot abundance between architectures (positive z-score indicates higher metal abundance  
 198 on architecture to left of inequality), **D)** Demonstration of metal abundance mapped across slide  
 199 for Fe and Mn (red indicates hotspot, blue indicates coldspot), juxtaposed with cellular  
 200 abundance (red indicates higher abundance), **E)** Dotplot demonstrating spearman correlation  
 201 associations between cell type abundance and elemental distribution—larger red dots indicate  
 202

203 positive associations of greater magnitude, whereas blue dots indicate negative associations,  
204 with size indicating magnitude; “Inter” represents the tumor interface

205

206 Our hotspot analysis revealed distinct elemental signatures associated with various histological

207 structures (**Figures 2A-C, S1, Tables S1-2**). Notably, the tumor regions were enriched in Cu,

208 Mg, Fe, and Mn. These differences were accentuated with respect to other tissue regions such

209 as the muscularis propria. Conversely, K, Zn, were relatively depleted in the tumor compared to

210 the muscularis propria. Zn concentrations were particularly high at the tumor interface.

211 Additionally, the muscularis propria showed significant enrichments of metals such as Zn, K, Ca

212 as compared to serosal tissue.

213

214 Deconvolution of ST into cell-type proportions revealed significant associations between various

215 metals and specific cell types (**Figures 2D,E, S1, Table S3**). For instance, Cu was positively

216 associated with presence of mast cells, B naive cells, endothelial cells, macrophages, and

217 plasma cells, indicating a broad involvement across immune and vascular functions. Fe was

218 associated with a mesenchymal phenotype, plasma cells, and B memory cells. Mg exhibited

219 positive associations with B cell precursors and proliferating B cells. Mn was positively linked to

220 dendritic cells. Zn and K both showed negative correlations with epithelial cells and red blood

221 cells. Ca exhibited negative correlation with monocytes.

222

223 ***Metals-Based Pathway Analysis***



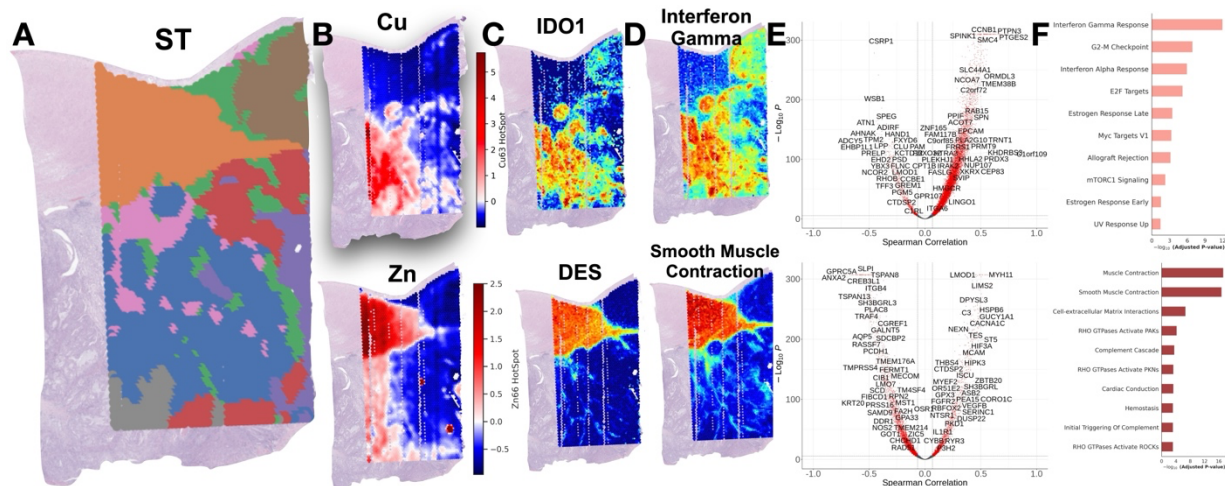

224  
 225 **Figure 3: Pathway Analysis Findings:** **A)** Visual representation of ST data through Leiden  
 226 clustering, revealing distinct regions, **B)** Cu and Zn Gi\* hotspot statistics, **C)** Visualization of  
 227 spatial distribution of IDO1 and DES gene expression demonstrating association with respective  
 228 elements, **D)** Visualization of Interferon Gamma Response and Smooth Muscle Contraction  
 229 through aggregating gene expression across pathway compared to a background distribution,  
 230 again found to be associated with respective elements, **E)** Volcano plot mapping spearman  
 231 correlation between 18074 genes and Gi\* statistics for respective metals on x-axis and -log<sub>10</sub>(p-  
 232 values) on y-axis– p-value and correlation cutoffs were set at 0.05/18074; **F)** Pathways  
 233 associated with respective elements (top includes most significant MsigDB Cancer Hallmarks  
 234 for Cu abundance and bottom includes most significant Reactome pathways for Zn abundance)  
 235

236 Our differential expression analysis uncovered a wide range of biological pathways associated  
 237 with biomolecular accumulation, reflecting variations in cellular composition, immune responses,  
 238 and tissue architecture (**Tables S4-7**). A demonstration of the spatial covariation between

239 elements and specific genes can be found in **Figures 3,S1**. This analysis highlighted both  
 240 shared and unique roles of different metals in key cellular processes, including but not limited to:

241

242 *Immune Response, Inflammation, and Complement Activation.* We identified metals which co-  
 243 occurred with genes involved in key immune signaling pathways such as Interferon Gamma  
 244 Response (Cu, p=1.09e-12; Mg, p=6.46e-18; Mn, p=5.92e-18) and Allograft Rejection (Mn,  
 245 p=1.38e-29; Mg, p=2.23e-22). Additionally, these metals were involved in Complement  
 246 Activation and IL-2/STAT5 Signaling (Fe, p=0.000175), indicating their significant roles in  
 247 modulating immune responses within the TME. Cu was also prominently linked to IL-

248 6/JAK/STAT3 Signaling ( $p=0.00505$ ), a pathway known to be involved in inflammatory  
249 responses and immune regulation. Moreover, Mg was associated with pathways like PD-1  
250 Signaling ( $p=1.47e-06$ ) and Phosphorylation of CD3 and TCR Zeta Chains ( $p=6.42e-05$ ), further  
251 emphasizing the impact of these elements on immune cell activation and signaling.

252

253 *Epithelial-Mesenchymal Transition (EMT), Cell Motility, and Tissue Remodeling.* Fe, along with  
254 K and Zn, was prominently associated with pathways involved in EMT and cell motility,  
255 highlighting their roles in processes like EMT (Fe,  $p=4.38e-21$ ) and Cell-extracellular Matrix  
256 Interactions (Fe,  $p=9.41e-11$ ; Zn,  $p=2.06e-07$ ). These elements were also linked to Apical  
257 Junctions and RHO GTPase activation, both of which are crucial for cell adhesion, migration,  
258 and tissue remodeling (Fe,  $p=2.75e-05$ ; Zn,  $p=1.17e-06$ ).

259

260 *Myogenesis and Muscle Contraction.* K and Zn were strongly associated with pathways related  
261 to myogenesis, muscle contraction, and ECM interactions, emphasizing their crucial roles in  
262 tumor progression. For example, myogenesis was significantly linked with K ( $p=5.48e-15$ ).  
263 Similarly, Smooth Muscle Contraction was associated with K ( $p=2.36e-15$ ) and Zn ( $p=1.69e-17$ ).  
264 Zn was also found to play a significant role in Muscle Contraction ( $p=5.79e-18$ ).

265

266 *Cell Signaling, Apoptosis, and DNA Repair.* Pathways related to cell signaling, apoptosis, and  
267 DNA repair were notably enriched for elements such as Cu, Mg, Mn, and Fe. For instance, Cu  
268 showed significant enrichment in the G2-M Checkpoint ( $p=1.30e-07$ ) pathways. These elements  
269 also demonstrated enrichment in apoptosis-related pathways (Mg,  $p=7.49e-03$ ).

270

271 *Oxidative Stress, Cellular Repair, and Hormonal Regulation.* Fe was prominently associated  
272 with pathways related to oxidative stress, cellular repair mechanisms, and hormonal responses.  
273 Fe's involvement in the Hypoxia pathway ( $p=0.000881$ ) and Angiogenesis ( $p=0.0104$ ) highlights

274 its critical role in cellular adaptation to low oxygen levels, a hallmark of rapidly growing tumors.  
275 Additionally, Fe was strongly linked to KRAS Signaling Up ( $p=1.60e-16$ ), reflecting its role in key  
276 oncogenic signaling pathways. These associations underscore the multifaceted importance of  
277 Fe in tumor growth, stress responses, and repair mechanisms within the TME. The depletion of  
278 pathways like and p53 Pathway ( $Ca$ ,  $p=1.25e-08$ ) may further indicate alterations in hormonal  
279 signaling and cellular stress responses within the TME.

280

281 *Metabolic Regulation and Signal Transduction.* Metabolic pathways, including glycolysis and  
282 cholesterol homeostasis, were frequently enriched in Zn and Cu, highlighting their roles in tumor  
283 metabolic adaptations. Zn was significantly involved in Glycolysis ( $p=7.09e-07$ ), while Cu  
284 showed enrichment in mTORC1 Signaling ( $p=5.05e-03$ ), emphasizing their contributions to the  
285 metabolic flexibility required for tumor survival within the TME.

286

### 287 ***Further Examination of Cu Homeostasis and Fe-Related EMT Pathways***

288

289 We further examined the relationship between specific genes and metal abundance within key  
290 pathways using PathVisio, overlaying correlations onto WikiPathway diagrams (**Figures S2-3**)  
291 <sup>49-54</sup>. For genes correlating with Cu abundance, significant associations were observed within  
292 Cu homeostasis pathways. In particular, metal ion solute carrier (SLC) transporters MT1E  
293 ( $p=0.40$ ,  $p<0.001$ ) and MT1G ( $p=0.40$ ,  $p<0.001$ ) were strongly correlated with Cu levels.  
294 Additionally, ATOX1 ( $p=0.15$ ,  $p<0.001$ ), a Cu chaperone delivering  $Cu^+$  to P-type ATPases  
295 such as ATP7A ( $p=0.31$ ,  $p<0.001$ ), exhibited notable correlations. Through its suppressive  
296 effects on SOD3, a key antioxidant gene, ATP7A may influence tumor progression <sup>55-58</sup>. SOD3  
297 protects against oxidative stress and maintains cellular redox balance, and its downregulation  
298 has been associated with increased oxidative stress and induction of EMT, processes linked to  
299 tumor metastasis <sup>59</sup>. Correspondingly, SOD3 ( $p=-0.36$ ,  $p<0.001$ ) showed the strongest negative



300 correlation with Cu abundance within this pathway, suggesting that elevated Cu levels may  
301 drive downregulation of this protective gene through upregulation of ATP7A, further promoting  
302 cancer aggressiveness.

303

304 For Fe abundance, spatial correlations were identified with specific genes linked to EMT-related  
305 pathways. Among these, FN1 ( $\rho=0.34$ ,  $p<0.001$ ), which encodes fibronectin, a protein involved  
306 in promoting cell motility through collagen matrix remodeling and serving as a marker for  
307 cancer-associated fibroblasts<sup>60,61</sup>, was most notable. Additional key correlations were observed  
308 with SPARC ( $\rho=0.36$ ,  $p<0.001$ ), which phosphorylates focal adhesion kinase (FAK) to stimulate  
309 tumor cell invasion<sup>62</sup>, and MMP9 ( $\rho=0.32$ ,  $p<0.001$ ), a matrix metalloproteinase associated with  
310 extracellular matrix (ECM) degradation, lymph node metastasis, and poorer survival outcomes  
311<sup>63,64</sup>. By examining these specific gene correlations within their respective pathways, our  
312 analysis highlights the intricate interplay between metal abundance and gene activity in the  
313 tumor microenvironment.

314

315

316 ***Spatial Clustering of Metals, Genes, Cell-Types***

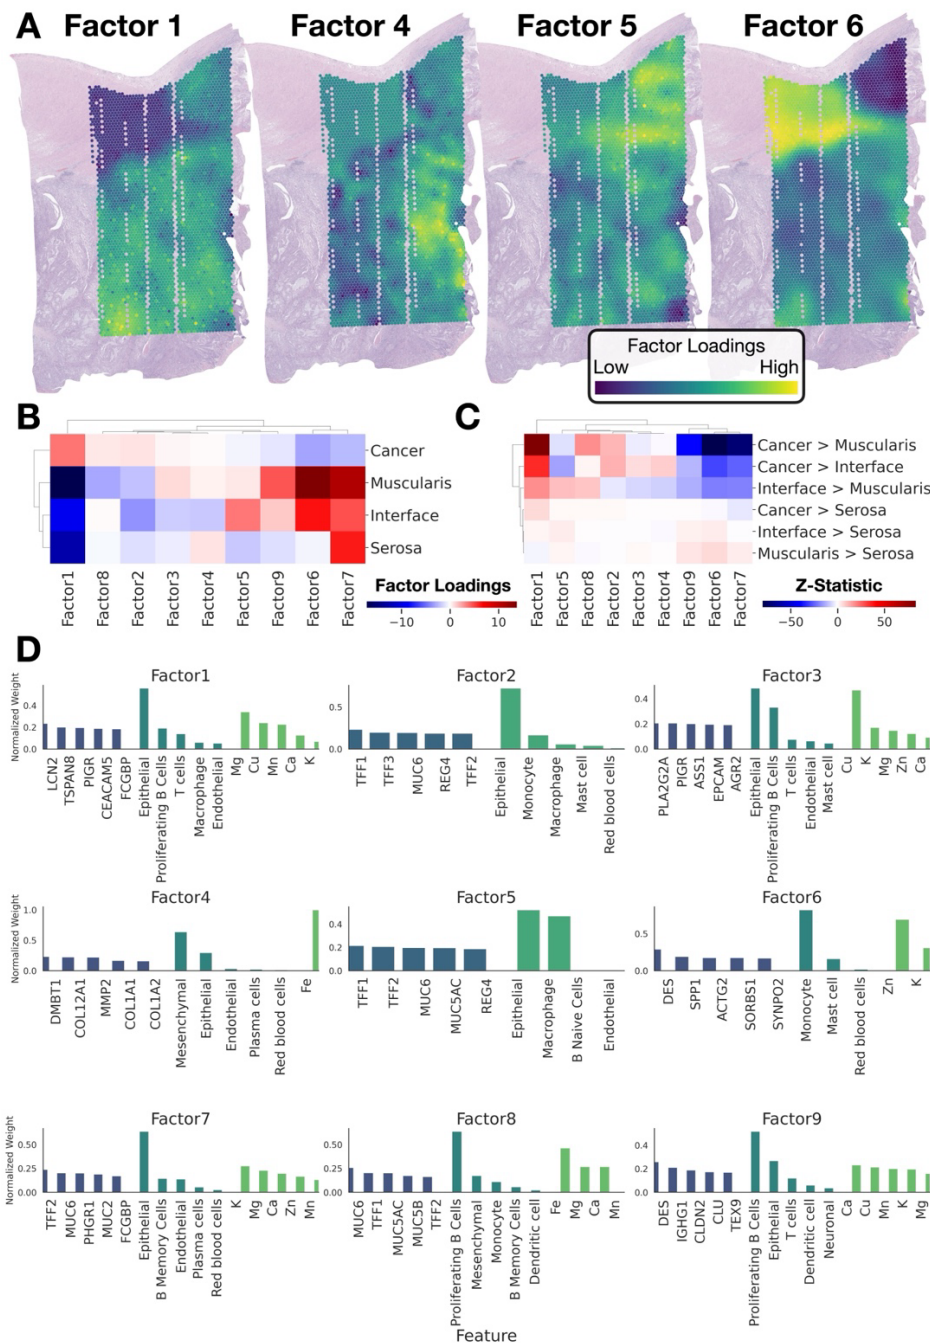

317  
 318 **Figure 4: Spatial Multimodal Factor Analysis Results: A)** Plotting of factor loadings from four  
 319 of nine discovered spatial factors, **B)** Clustermap demonstrating factor loadings averaged  
 320 across architecture, **C)** Relative differences in factor loadings between tissue architectures,  
 321 hierarchically clustered, **D)** Composition of factors, top five features per data type (genes, cell  
 322 types, metals); contributions of these features were normalized to sum to one within each data  
 323 type  
 324  
 325 The pathway associations identified in our analysis suggest significant roles for various metals  
 326 in critical biological processes such as immune response, cell cycle regulation, and ECM

327 interactions. However, these associations raise important questions about how these processes  
328 are spatially organized within the tumor microenvironment. Spatial colocalization of metals and  
329 specific cellular activities is likely more pronounced in certain regions of the tissue, where  
330 distinct tissue architectures may drive localized biological effects. To explore these spatial  
331 patterns and their implications for tumor behavior, we conducted a spatial factor analysis to  
332 summarize these associations within distinct tissue architectures (**Figure 4**).

333

334 The spatial factor analysis using MEFISTO yielded nine factors corresponding to a variety of  
335 biological pathways (see **Figures S4-5, Tables S8-10**)<sup>65</sup>. Factor 1 was primarily concentrated  
336 within the tumor and was associated with the accumulation of Mn and Cu, alongside pathways  
337 related to mucin O-glycosylation, glycolysis and estrogen response<sup>66-68</sup>. Factor 4 was linked to  
338 a mesenchymal phenotype and associated with Fe, showing strong connections to gene  
339 signatures tied to EMT. Factor 5 was predominantly localized at the tumor interface, associated  
340 with both epithelial and macrophage cells, and was enriched in pathways related to EMT and  
341 immune responses, including Dectin-2 and Defective GALNT12 causes CRCS1. Finally, Factor  
342 6 was connected to myogenesis, muscle contraction, and monocyte presence, with a  
343 concentration of Zn at the tumor interface and in the muscularis.

344

#### 345 ***How Much of the Spatial Elemental Distribution Can Be Explained by Transcriptomic,*** 346 ***Cellular, and Pathway Activity Variation?***

347

348 We used a multivariable predictive modeling approach with the MISTy package to evaluate how  
349 well transcriptomic, cellular, and pathway activity variations explain the spatial distribution of  
350 elements within the tumor microenvironment<sup>69</sup>. This approach employed spatially weighted  
351 random forest models to predict metal concentrations based on pathway activity scores, cell  
352 type abundances, and the spatial gene expression of selected genes at the same or

353 neighboring spots. Our analysis found that a substantial proportion of the variation in elemental  
354 distribution can be attributed to these spatial transcriptomic data types. For elements such as K,  
355 Cu, Mn, Mg, Ca, and Fe, the models achieved  $R^2$  values exceeding 75%, indicating a high level  
356 of explainability (**Figure S6, Table S11**).

357

358 Among the predictors, spatial gene expression markers were the most significant influences  
359 upon elemental variation. In contrast, pathway activity scores and cell type abundances were  
360 less predictive, potentially due to the information loss during data aggregation. Interestingly,  
361 when incorporating other elemental concentrations as predictors, the majority of the variation in  
362 elemental distribution was accounted for by these other elements and cell types, rather than  
363 gene expression alone. A comprehensive list of gene, cell type, and pathway interactions with  
364 metals is provided in **Figure S6 and Table S11**.

365

## 366 **Discussion**

367 Targeting metal-dependent signaling and chaperoning within and around tumors has emerged  
368 as a promising strategy for inhibiting tumor growth and spread<sup>5,12,70</sup>. However, this approach is  
369 challenging due to the limited understanding of how metals accumulate within tumors.

370 Developing a comprehensive map of the conditions and consequences of metal accumulation in  
371 tumors and their surrounding microenvironment is crucial for advancing next-generation cancer  
372 therapies. The differential bioaccumulation of endogenous metals, which may reflect variations  
373 in nutrient intake, storage, or disruptions in homeostasis, underscores the need for such a map.

374 This metal map would provide valuable insights into the bidirectional molecular mechanisms  
375 governing metal accumulation, whether in excess or deficiency. By understanding how these  
376 metals contribute to tumor progression, we can better identify potential biomarkers and  
377 therapeutic targets, paving the way for more effective treatments.

378

379 In this study, we focused on spatially characterizing CRC tumorigenesis, as lifestyle factors  
380 such as dietary intake, which is one of many factors influencing metabolic activity and  
381 inflammation, can significantly impact tumor development, offering another promising  
382 therapeutic avenue in addition to chelation. The computational workflow that was developed and  
383 implemented is the first of its kind and has uniquely layered on spatial transcriptomics atop  
384 elemental imaging to facilitate a metals-based pathway analysis. Our workflow offers a  
385 preliminary understanding of dynamic interplay between metallic and molecular alterations  
386 within the TME.

387

388 By integrating histology imaging and pathology annotation, we demonstrated metal  
389 bioaccumulation across various tumor microenvironment compartments, with Cu localizing  
390 intratumorally and Fe accumulating at the tumor's proliferative front and within the stromal  
391 architecture. Cu, essential for mitochondrial energy metabolism in cancer cells, was primarily  
392 localized within the tumor, corroborating prior studies showing that Cu chelation can kill colon  
393 cancer cells by preventing redox cycling and thereby reducing the generation of reactive oxygen  
394 species. Fe, on the other hand, was found in the tumor stroma<sup>71,72</sup>. This finding aligns with prior  
395 research suggesting that Fe accumulation in this region may result from residual Fe following  
396 intralesional hemorrhage. Larger tumors, with their fragile neovascular blood vessels, are prone  
397 to bleeding, which could contribute to this stromal Fe deposition, as demonstrated through  
398 supporting literature<sup>73</sup>. Indeed, deposits of Fe were found to be associated with hypoxia-related  
399 genes. These findings were further supported by spatial integration of single-cell data with ST to  
400 derive cell-type proportion estimates, which established an epithelial association for Cu and a  
401 mesenchymal/stromal phenotype for Fe. The presence of Fe in regions tied to stromal/collagen  
402 remodeling aligns with the epithelial-to-mesenchymal transition, a key process in tumor  
403 progression. Additionally, Cu was not only found within tumor areas but also co-localized with  
404 endothelial cells, plasma cells, and macrophages. Pathway analysis recapitulated Cu's dual

405 role: promoting CRC proliferation, as indicated by enrichment in Mitotic Cell Activity, and  
406 stimulating the antitumoral immune response through interferon signaling and immune  
407 recruitment via the surrounding vasculature and lymphatics, consistent with prior literature <sup>74</sup>.  
408 Both Cu and Fe findings were reinforced by differential expression analyses and visualization of  
409 spatial metal-gene correlations overlaid on pathways governing Cu homeostasis, metabolic  
410 reprogramming, and Fe-related EMT processes. These pathways highlight where their shared  
411 contributions relate to aggressive tumor phenotypes. Future studies are needed to validate  
412 these associations and disentangle the roles of Cu and Fe within specific cell mixtures localized  
413 in distinct tissue architectures. Together, these findings provide a nuanced understanding of Cu  
414 and Fe's roles in tumor progression, consistent with prior literature while demonstrating the  
415 potential for new insights spurred through spatial integration and pathway-level analyses.

416

417 While Cu and Fe are key metals in cancer biology, other metals, such as Mn and Mg, also  
418 showed significant tumor concentrations and warrant further investigation for their distinct roles.  
419 Neither Mg nor Mn was associated with an epithelial phenotype, suggesting their involvement  
420 with other tumor-infiltrating cells. Previous research has linked increased cellular Mg to DNA  
421 and protein synthesis, as well as tissue growth, which aligns with our observation of Mg's  
422 localization within the tumor and its association with the G2M cell cycle pathway <sup>75</sup>. Like Cu, Mg  
423 was also highly enriched for genes associated with inflammatory signaling via the  
424 Interferon/cytokine signaling pathway, among others. In contrast, Mn localized within the tumor  
425 likely due to its role in the antitumor immune response <sup>76</sup>. Prior studies have suggested Mn's  
426 role in promoting dendritic cells, which is consistent with our findings showing the strongest  
427 correlation of Mn with dendritic cell presence within the tumor.

428

429 Zn was found colocalized at the tumor interface and has been shown in prior studies to alter  
430 cytoskeletal integrity, motility, and invasiveness of colon cancer cells, suggesting a potential role

431 in chemoprevention. This cytoskeletal activity is consistent with pathway activation related to  
432 myogenesis and muscle contraction, though not much is known about its precise mechanisms  
433 within tumors.

434

435 The presence of K and Ca at the tumor interface may reflect long-term accumulation in the  
436 colon's muscularis propria, which consists of older, longer-lasting cells. This buildup is likely due  
437 to extended exposure to these elements. As a validation, we also found Ca ions within the same  
438 regions. Previous studies have shown that Ca affects intestinal smooth muscle contraction,  
439 partly by influencing its permeability—consistent with our findings of Ca within these  
440 architectures<sup>77</sup>. Additionally, both Ca and K were related to Ca<sup>2+</sup>-activated K<sup>+</sup> channels,  
441 supporting this effect and validating our approach.

442

443 These associations underscore the unique potential enabled by integrating these advanced  
444 technologies. It's important to highlight that a significant proportion of elemental distribution  
445 within tumors has been confirmed to have biomolecular underpinnings that govern not only  
446 metal deposition, redistribution, and chaperoning but also the downstream consequences of  
447 metal presence, such as inflammation. Developing mechanistic associations between these  
448 findings and tumor biology will take time, but the progress is promising.

449

450 The advantage of pathway analysis through whole transcriptomic profiling lies in the broad  
451 scope and range of pathways that can be explored, offering real potential for biomarker and  
452 intervention discovery. However, it is crucial to emphasize that while some findings in this  
453 manuscript are confirmatory, they are largely exploratory and require validation and expansion  
454 to a larger, unbiased cohort. Some of the pathways identified in this analysis reflect normal  
455 colonic function rather than tumorigenesis. We have been careful to limit the set of considered  
456 elements to avoid overstating conclusions. Future work will delve deeper into cell-type



457 associations using complementary imaging techniques and will also investigate alterations that  
458 exceed those attributable solely to tissue architectural changes. Key indicators of tumor  
459 progression and metastasis can only be fully understood when employing these technologies on  
460 a larger scale / expanded cohort. CRC progression and tumorigenesis are heavily influenced by  
461 various factors, including tumor sidedness, genetic and lifestyle factors, invasiveness, grade,  
462 sex, and other confounders and modifiers including deficiencies in mismatch repair was the  
463 case with this patient which can reflect a T-cell exhausted phenotype. Addressing these  
464 complexities will be essential in advancing our understanding and treatment of CRC.

465  
466 Furthermore, tissue sections were separated by 5 microns, which assumes smooth tissue  
467 changes and may lead to potential imprecisions in co-registration, thereby impacting the  
468 findings. Profiling device noise also introduces additional challenges with regards to precision.  
469 Tissue was analyzed with paraffin intact which can lead to random signal attenuation due to  
470 build-up of paraffin within the LA-ICPTOF-MS capture tube if the capture tube is too small. We  
471 did not deparaffinize because it has the potential to shift elemental distribution and reduce  
472 abundance. There are also biological buffers employed at various parts of tissue preparation  
473 that could influence findings— we were careful to remove elements that could have been  
474 influenced by preparation or overly represent individual variation. In the future, increasing the  
475 size of the capture tube should significantly reduce impact of paraffin at the cost of resolution  
476 (i.e., from 1-micron to 5-10 micron resolution). In our integrative analyses, metal abundance was  
477 aggregated at a 50-micron resolution, which we felt was reasonable. Single-cell analysis was  
478 not possible at this time due to the 5-micron separation between EI and ST sections and the  
479 laser-destructive nature of this process— future work in this area may enhance the resolution of  
480 these findings and better appreciate tissue changes between adjacent sections<sup>78</sup>. It should also  
481 be noted that due to the ionization of particles, LA-ICPTOF-MS was not developed to  
482 characterize valence states. However, further understanding of speciation components that



483 catalyze biomolecular interactions may be accomplished by pairing this technique with others,  
484 such as X-ray absorption near-edge structure (XANES)<sup>79,80</sup>. Analyzing smaller tissue regions at  
485 higher resolution may help deduce specific species, though performing these analyses at scale  
486 remains challenging.

487

488 This approach serves as a proof-of-concept workflow, demonstrating how the spatial integration  
489 of metals and gene analysis can soon be used to effectively capture the biological processes  
490 governing tumor metastasis, recurrence, and survival. This study paves the way for  
491 comprehensive exploration of spatial elemental data and gene expression in colorectal cancer  
492 and other tumor types, offering opportunities to advance therapeutic development, understand  
493 the biological and prognostic significance of elemental shifts, and investigate the impact of  
494 dietary intake on metal redistribution in early onset and progression of CRC.

495

#### 496 **Methods:**

##### 497 *Cohort Curation and Data Collection:*

498 In our study, we focused on a specific patient, selected randomly from a cohort of 45 specimens  
499 recently profiled using Visium Spatial Transcriptomics (ST). The selected patient, a 55-60 year-  
500 old female, had a left colon microsatellite stable (MSS) tumor (intact MLH1, MSH2, MSH6, and  
501 PMS2 expression assessed through immunohistochemistry) that metastasized to the liver. The  
502 tissue sections were processed using the Sakura Tissue-Tek Prisma Stainer for hematoxylin  
503 and eosin staining. For ST profiling, 5 µm tissue segments were sectioned and dissected from  
504 formalin fixed paraffin embedded tissue blocks, placed within a 11mm by 11mm capture region.  
505 A separate unstained 10 µm serial section was cut for elemental imaging. Finally, a subsequent  
506 5 µm section was left intact without macrodissection and was stained with H&E. The slides were  
507 scanned at 40X magnification (approximately 0.25 micron per pixel) using the Aperio-GT450

508 scanner (Leica, Wetzlar, Germany). The resulting hematoxylin and eosin-stained images were  
509 stored in SVS format with eight-bit color channels.

510

511 *Elemental Imaging:*

512 For the elemental profiling of the colorectal cancer tissue section, we used Laser Ablation  
513 Inductively Coupled Plasma Time-of-Flight Mass Spectrometry (LA-ICPTOF-MS)<sup>81</sup>. This  
514 method represents a significant advancement in spatially resolved elemental imaging, offering  
515 both enhanced resolution and analytical speed. In this process, a pulsed laser is used to ablate  
516 minute portions of the tissue sample. The ablated material, now in particulate form, is then  
517 carried via a helium gas stream into the mass spectrometer. The key feature of LA-ICPTOF-MS  
518 is its use of Time-of-Flight (TOF) technology, enabling rapid and comprehensive elemental  
519 detection across the entire periodic table. Operating at high frequencies (500-1000 Hz), the LA-  
520 ICPTOF-MS system at the Biomedical National Elemental Imaging Resource (BNEIR) allows for  
521 detailed mapping of elemental distribution with ultra-high resolution, down to 1  $\mu\text{m}$ . This  
522 capability is crucial for accurately capturing the complex elemental landscape within the tissue,  
523 providing insights into the spatial relationships and concentrations of various elements. By  
524 utilizing LA-ICPTOF-MS, we were able to conduct an untargeted yet thorough profiling of the  
525 tissue section, yielding detailed data on its elemental composition.

526

527 *Spatial Transcriptomic Profiling and Spot-Level Cell-Type Deconvolution:*

528 We utilized the 10X Genomics Visium CytAssist spatial transcriptomics (ST) assay for in-depth  
529 profiling of a tissue section<sup>82</sup>. The preparation of FFPE tissue sections involved several steps:  
530 firstly, placing the sections on standard histology slides, coverslipping in glycerol + xylene  
531 medium, followed by deparaffinization, rehydration, and H&E staining using a Sakura Tissue-  
532 Tek Prisma Stainer (Sakura Finetek USA, Inc. 1750 West 214th Street, Torrance, CA 90501).  
533 Subsequently, whole slide images were captured at 40x resolution on Aperio GT450 scanners

534 (see *Cohort Curation and Data Collection*). The slides were then decoverslipped in xylene over  
535 1-3 days to detach the coverslips. The subsequent steps, including destaining, probe  
536 hybridization, ligation, eosin staining, transfer to Visium slides via CytAssist, and library  
537 preparation, adhered to the manufacturer's protocol (CG000485). After initial preparation, the  
538 tissue underwent eosin staining and imaging, aligning with the original high-resolution pathology  
539 slides. Tissue permeabilization followed to release mRNA molecules, which bound to target  
540 probes on the slide via their poly(A) tails. The binding process was succeeded by ligation,  
541 extension, and amplification of these probes. Sequencing was performed using an Illumina  
542 sequencer (NovaSeq 6000), enabling high-resolution gene expression mapping. The  
543 Spaceranger software was employed for precise alignment of the CytAssist sections with the  
544 corresponding 40X H&E stains, ensuring accurate co-registration and quality control.  
545 Pathologists annotated the tumor's interior, periphery/interface, and surrounding architectures  
546 using the QuPath tool, permitting delineation of transcriptomic profiles in various tissue regions.  
547 Label propagation was used to refine unassigned annotations. To further characterize the tissue  
548 architecture, Visium data underwent dimensionality reduction via UMAP projection, which  
549 served as a precursor to graph-based Leiden clustering<sup>83,84</sup>. Subsequent refinement of cluster  
550 assignments was conducted through label propagation based on the spatial coordinates,  
551 specifically targeting areas with high entropy to enhance spatial consistency of the cluster  
552 labels. Finally, the delineated clusters were superimposed onto the whole slide images, with  
553 labels assigned in accordance with the tissue architecture as judged by a pathologist.  
554  
555 To understand the cellular composition within the CRC tissue, we combined spatial  
556 transcriptomics with single-cell RNA-Seq data collected from a serial section. We utilized the  
557 Chromium Flex assay for single-cell profiling of disaggregated FFPE tissue sections from  
558 specific capture areas, employing the same transcriptomic probe set as the Visium assay. This  
559 approach revealed diverse cell types within the tissue, following the manufacturer's

560 Demonstrated Protocol (CG000606). The generated data, processed using Cell Ranger v7.1.0,  
561 provided quality control metrics and cells-by-genes expression matrices for downstream  
562 analysis. For label transfer, cell types from a public single-cell RNA sequencing (scRNA-seq)  
563 dataset<sup>85</sup>, specifically categorized cells from the Colon, were used. Cell types were grouped  
564 into broader categories. Dendritic Cells encompassed cDC1, cDC2, Lymphoid DC, and pDC  
565 cells. Epithelial Cells, which in this context are representative of tumor cells, also leveraged  
566 signatures defining Goblet cells, Colonocytes, and Enterocytes, and so forth. Endothelial Cells  
567 were grouped to cover a range of arterial, venous, and lymphatic subtypes. Macrophages were  
568 categorized based on LYVE1+ and MMP9+ subtypes, while Mast Cells included both Mast cells  
569 and CLC+ Mast cells. Mesenchymal Cells, representing the tumor and normal fibrous stroma,  
570 included stromal cells, myofibroblasts, and pericytes. T Cells aggregated across CD4, CD8, and  
571 NK lineages. Plasma Cells included IgA and IgG subtypes. Additionally, Neuronal Cells,  
572 Monocytes, Neutrophils, Megakaryocytes, B Cell Precursors (including Immature B, Pro-B, Pre-  
573 B, and CLP cells), B Memory Cells, Proliferating B Cells and B Naive Cells, and Red Blood  
574 Cells were each treated as distinct categories. These cell type labels were transferred to our in-  
575 house CRC scRNA-seq dataset collected from a serial tissue section using SCVI (Single-Cell  
576 Variational Inference) framework<sup>86,87</sup>, which leverages a denoising variational autoencoder  
577 (VAE) trained to infer cell types. We employed the Cell2Location package for spot-level  
578 deconvolution, using the scRNA-seq data as a reference to estimate cell-type  
579 proportions/abundances in each spot<sup>88</sup>. This regression-based approach enabled us to spatially  
580 map the distribution of cell types within the CRC tissue section, yielding aggregate spot wise  
581 cellular abundances.

582

### 583 *Quality Control and Co-Registration via TRACE:*

584 Recently, our team developed TRACE, a software tool under the Biomedical National Elemental  
585 Imaging Resource, specifically designed to co-register highly multiplexed elemental assays with

586 tissue slides<sup>41,46,47</sup>. TRACE enables comprehensive spatial multimodal tissue analysis by  
587 integrating spatial elemental and transcriptomic data. In this colorectal cancer study, TRACE  
588 was instrumental in co-registering multi-channel elemental images with whole slide images  
589 (WSI). Initially, TRACE's preprocessing workflow aggregated elemental abundance across  
590 channels and user defined thresholding through interactive segmentation of background regions  
591 to accurately detect tissue in the elemental maps. Refinement of tissue detection involved  
592 Gaussian filtering for reduction of outliers, which can impact tissue detection, and morphological  
593 operations (binary opening/closing) to further refined these images, focusing on removing noise  
594 and defining contiguous regions for analysis (**Figure S7A**).

595  
596 A key challenge in preprocessing was addressing directional stripe artifacts in elemental  
597 imaging. To tackle this, we employed anisotropic diffusion filtering to reveal sharp edge patterns  
598 in the tissue followed by the probabilistic Hough transform which is a line fitting and detection for  
599 isolating detected strips<sup>89,90</sup>. Line detection was followed by morphological transformations to  
600 remove the artifacts (**Figure S7B-F**). This meticulous process ensured elemental maps were  
601 free of distortions that could impact the analysis. We also encountered metal washout at tissue  
602 edges, particularly for elements like iron, and implemented a targeted erosion technique to  
603 address this issue. This strategy selectively eroded the edges of the tissue mask, effectively  
604 minimizing edge-related distortions and ensuring a more accurate representation of elemental  
605 distribution within the core tissue areas (**Figure S7G**).

606  
607 For co-registration, a landmark-based approach with Homography matrix transformation aligned  
608 the elemental maps with the ST-associated WSI. Selecting 30 manual fiducials that marked  
609 structural similarities between the elemental maps and WSI enabled us to precisely overlay the  
610 elemental map onto the WSI. Recall that ST, single cell data and pathologist annotations had  
611 been mapped to these same H&E WSI, providing a common reference frame for integration with

612 the elemental maps. TRACE exports a SpatialData file containing elemental abundance and  
613 tissue region annotations supplied and integrated using QuPath<sup>91,92</sup>. Using the Nearest  
614 Neighbors algorithm (capturing adjacent pixels within radius of Visium spot), we assigned pixel  
615 coordinates from the elemental maps to the nearest Visium spots. Elemental pixel values were  
616 aggregated within spot, combining elemental and transcriptomic data onto a unified frame using  
617 SpatialData (interoperable with Anndata and Muon) data formats for in-depth analysis<sup>93</sup>.

618

#### 619 *Hotspot Analysis:*

620 We represented the spatial distribution of elemental metal concentrations within tissue sections  
621 by identifying areas of concentrated metal abundance. This was achieved by calculating  
622 hotspots using the Getis-Ord  $G_i^*$  statistic<sup>48</sup>, implemented through the pySAL package<sup>94</sup>. The  
623 Getis-Ord  $G_i^*$  statistic, a spatial statistic, evaluates the metal concentration in each pixel or spot  
624 in relation to its neighbors (taken to be spots within approximately 80 micron), producing spot-  
625 level z-scores and p-values. These scores helped us discern statistically significant areas where  
626 metal concentrations were either unusually high (hot spots) or low (cold spots) compared to the  
627 expected local average. Our approach involved permutation testing and normality assumptions  
628 to ensure the robustness of identified hotspots. Throughout the remainder of the manuscript, we  
629 used  $G_i^*$  z-scores to represent elemental hotspotting, serving as the primary variable to reflect  
630 elemental abundance.

631

#### 632 *Association of Hotspots with Tissue Histology and Cell-Type Abundances:*

633 Linear regression models were used to associate the hotspot  $G_i^*$  z-scores representing  
634 elemental abundance (dependent variable) with specific tissue architectures (four regions—  
635 cancer, serosa, interface, muscularis) represented as categorical fixed effects. Post-hoc  
636 pairwise comparisons between tissue architectures (e.g., tumor vs. interface) were conducted  
637 using estimated marginal means (R v4.1, emmeans package), which calculated mean  $G_i^*$

638 statistics (hotspot concentrations) for each tissue type/architecture<sup>95</sup>. The mean statistics and  
639 their relative differences estimated through the linear modeling were hierarchically clustered to  
640 reveal similarities between elements in their distribution. Similarly, spatially-integrated cell-type  
641 proportions were associated with varying metal concentrations represented using  $G_i^*$  statistics  
642 using spearman correlations. The spearman correlation matrix between metals and cell-types  
643 were hierarchically clustered to reveal metals with similar cell-type associations. Differences  
644 were visualized with boxplots, dotplots and clustered heatmaps with dendrograms.

645

#### 646 *Differential Expression and Pathway Analysis:*

647 Spearman correlations were employed to compare spatial gene expression with elemental  
648 abundance, linking  $G_i^*$  z-scores representing transformed elemental abundance as our  
649 elemental features with spatial transcriptomics across the entire transcriptome for each metal.  
650 Results were visualized using volcano plots<sup>96</sup>. After Bonferroni adjustment to account for  
651 multiple comparisons (alpha significance level of 0.05/18074 for 18074 genes tested), we  
652 selected the 150 top differentially expressed genes for each element, ranked by their adjusted  
653 p-values (all 150 genes surpassed the Bonferroni adjustment for all metals). Separate sets of  
654 150 genes were selected based on whether correlations were positive, negative or based on the  
655 magnitude of the correlation. For each metal, pathway analyses using the Enrichr package were  
656 conducted across various pathway databases (including MsigDB Cancer Hallmarks 2020,  
657 Reactome 2022) for genes associated with positive and negative elemental concentration  
658 changes, and separately for genes regardless of whether their test statistics were positive or  
659 negative<sup>97</sup>. Using PathVisio, metal gene correlations for Cu and Fe were also visualized atop  
660 genes involved in Copper Homeostasis and Epithelial-to-Mesenchymal related pathways,  
661 downloaded from WikiPathways<sup>49-54</sup>.

662

663 *Integrating Spatial Multimodal Analysis to Profile Elemental, Genetic, and Cellular Co-*  
664 *Localization and Their Interactions*

665 MEFISTO is a computational approach for analyzing multi-modal spatial biological data,  
666 unraveling latent factors that capture spatial variations linked to genes, metals, and cell types <sup>65</sup>.  
667 It leverages tensor factorization alongside spatial and hierarchical Gaussian Processes to  
668 handle spatial autocorrelation, uncovering profiles that include gene expressions, elemental  
669 concentrations, and cell-type distributions. To refine the model, we limited factors to at most 20  
670 factors, employed spike-and-slab priors for sparsity, and set Gaussian likelihoods for each data  
671 type with pseudo-log transformation for elemental abundances and cell type abundances, and  
672  $G_i^*$  z-scores for EI. For efficient training, we used a fast convergence mode leveraging sparse  
673 Gaussian processes, discarded low-impact factors, and harnessed GPU acceleration. Post-  
674 training, we examined the factors associated with specific tissue architectures using linear  
675 modeling on the spot-level factor loadings, similar to the above, and conducted a pathway  
676 analysis (Enrichr; MsigDB Cancer Hallmarks 2020, Reactome 2022) based on factor associated  
677 genes with an FDR adjusted p-value less than 0.05.

678  
679 Unlike MEFISTO, which focuses on unraveling latent factors in multi-modal data, MISTy  
680 analyzes the spatial interactions among different features like genes, elements, and cell types.  
681 MISTy employs a multivariable model to determine how features including pathway activities,  
682 genes, and cell types relate to elemental abundance, using a spatially weighted approach <sup>69</sup>.  
683 Specifically, it assesses the predictiveness of these factors on elemental abundance, employing  
684 a squared exponential decay kernel to account for spatial proximity. Pathway activity was  
685 estimated using the Progeny database through the Decoupler package <sup>98,99</sup>. Spatially-informed  
686 random forest models were fit to predict elemental abundance from the spatial transcriptomic  
687 data types. The ability of the ST datatypes to explain elemental variation throughout the slide  
688 was estimated through the calculation of an element-specific  $R^2$  gain score. MISTy broke this



689 score down by each of the ST datatypes (scRNASeq/cell proportions, ST, pathway activity),  
690 representing their relative contributions. Contributions from other elements were included in the  
691 model (other than the one being estimated)— a new  $R^2$  gain score was estimated which  
692 demonstrated the relative contributions of ST data versus the mixture/associations with other  
693 elements. Predictive elements, genes, pathways and cell-types were provided using feature  
694 importance scores via the impurity-based Gini index.

695

### 696 **Post-Hoc Exclusion of Elements and Isotopes**

697 All detectable elements underwent spatial multimodal analysis. However, certain elements and  
698 select isotopes were removed post-hoc to ensure the reliability and biological relevance of the  
699 findings. Specifically, elements such as Na, Cd, Cr, V, As, Mo, Gd, Ru, Pt, Al, Ag, Se, Pb, Ba,  
700 Ni, Sb, Co, and Tl were excluded, despite their detection across the slide. These elements were  
701 removed to account for potential influences from tissue preparation processes, biological  
702 buffers, or individual variation, which could disproportionately impact their representation.  
703 Additionally, some of these elements, while detected, were not previously hypothesized to exist  
704 at significant levels in the colon. Although their presence here is informative and warrants future  
705 exploration, we chose to exclude them to avoid overstating conclusions or misinterpreting  
706 findings in the current study. This selective approach ensures the remaining set of elements  
707 aligns with the study's focus on tumor-related elemental interactions and provides a foundation  
708 for more targeted analyses in future work.

709

710 **References**

- 711
- 712 1. Wong, M. C. *et al.* Differences in incidence and mortality trends of colorectal cancer  
713 worldwide based on sex, age, and anatomic location. *Clinical Gastroenterology and*  
714 *Hepatology* **19**, 955–966 (2021).
  - 715 2. Kasi, P. M. *et al.* Rising proportion of young individuals with rectal and colon cancer. *Clinical*  
716 *Colorectal Cancer* **18**, e87–e95 (2019).
  - 717 3. Patel, S. G. & Ahnen, D. J. Colorectal cancer in the young. *Current gastroenterology reports*  
718 **20**, 1–12 (2018).
  - 719 4. Coradduzza, D. *et al.* Heavy metals in biological samples of cancer patients: a systematic  
720 literature review. *Biometals* (2024) doi:10.1007/s10534-024-00583-4.
  - 721 5. Tang, D., Kroemer, G. & Kang, R. Targeting cuproplasia and cuproptosis in cancer. *Nat Rev*  
722 *Clin Oncol* **21**, 370–388 (2024).
  - 723 6. Ge, E. J. *et al.* Connecting copper and cancer: from transition metal signalling to  
724 metalloplasia. *Nat Rev Cancer* **22**, 102–113 (2022).
  - 725 7. Villareal, L. B., Falcon, D. M., Xie, L. & Xue, X. Hypoxia-inducible factor 3 $\alpha$ 1 increases  
726 epithelial-to-mesenchymal transition and iron uptake to drive colorectal cancer liver  
727 metastasis. *British Journal of Cancer* 1–12 (2024).
  - 728 8. Xue, X. *et al.* Hypoxia-inducible factor-2 $\alpha$  activation promotes colorectal cancer progression  
729 by dysregulating iron homeostasis. *Cancer research* **72**, 2285–2293 (2012).
  - 730 9. Xue, X. *et al.* Iron uptake via DMT1 integrates cell cycle with JAK-STAT3 signaling to  
731 promote colorectal tumorigenesis. *Cell metabolism* **24**, 447–461 (2016).
  - 732 10. Estêvão, D. *et al.* Iron metabolism in colorectal cancer: a balancing act. *Cell Oncol.* **46**,  
733 1545–1558 (2023).
  - 734 11. Sun, M. *et al.* Cadmium promotes colorectal cancer metastasis through EGFR/Akt/mTOR  
735 signaling cascade and dynamics. *Sci Total Environ* **899**, 165699 (2023).
  - 736 12. Baldari, S. *et al.* Effects of copper chelation on BRAFV600E positive colon carcinoma cells.  
737 *Cancers* **11**, 659 (2019).
  - 738 13. Gartner, E. M. *et al.* A pilot trial of the anti-angiogenic copper lowering agent  
739 tetrathiomolybdate in combination with irinotecan, 5-fluorouracil, and leucovorin for metastatic  
740 colorectal cancer. *Invest New Drugs* **27**, 159–165 (2009).
  - 741 14. Liao, Y. *et al.* Inflammation mobilizes copper metabolism to promote colon tumorigenesis via  
742 an IL-17-STEAP4-XIAP axis. *Nat Commun* **11**, 900 (2020).
  - 743 15. Emre, O. *et al.* Plasma Concentrations of Some Trace Element and Heavy Metals in  
744 Patients with Metastatic Colon Cancer. *Journal of Cancer Therapy* **4**, 1085–1090 (2013).
  - 745 16. Li, Y. *et al.* The role of heavy metals in the development of colorectal cancer. *BMC Cancer*  
746 **23**, 616 (2023).
  - 747 17. Fatfat, M. *et al.* Copper chelation selectively kills colon cancer cells through redox cycling  
748 and generation of reactive oxygen species. *BMC cancer* **14**, 1–12 (2014).
  - 749 18. Maus, M. *et al.* Iron accumulation drives fibrosis, senescence and the senescence-  
750 associated secretory phenotype. *Nature Metabolism* **5**, 2111–2130 (2023).
  - 751 19. Finney, L., Vogt, S., Fukai, T. & Glesne, D. Copper and angiogenesis: unravelling a  
752 relationship key to cancer progression. *Clin Exp Pharmacol Physiol* **36**, 88–94 (2009).
  - 753 20. Fouani, L., Menezes, S. V., Paulson, M., Richardson, D. R. & Kovacevic, Z. Metals and  
754 metastasis: exploiting the role of metals in cancer metastasis to develop novel anti-  
755 metastatic agents. *Pharmacological Research* **115**, 275–287 (2017).
  - 756 21. Chan, N. *et al.* Influencing the Tumor Microenvironment: A Phase II Study of Copper  
757 Depletion Using Tetrathiomolybdate in Patients with Breast Cancer at High Risk for  
758 Recurrence and in Preclinical Models of Lung Metastases. *Clinical Cancer Research* **23**,  
759 666–676 (2017).

- 760 22. Liu, Y. L. *et al.* Tetrathiomolybdate (TM)-associated copper depletion influences collagen  
761 remodeling and immune response in the pre-metastatic niche of breast cancer. *npj Breast*  
762 *Cancer* **7**, 1–11 (2021).
- 763 23. Pan, Q. *et al.* Copper deficiency induced by tetrathiomolybdate suppresses tumor growth  
764 and angiogenesis. *Cancer research* **62**, 4854–4859 (2002).
- 765 24. Song, M., Garrett, W. S. & Chan, A. T. Nutrients, Foods, and Colorectal Cancer Prevention.  
766 *Gastroenterology* **148**, 1244-1260.e16 (2015).
- 767 25. Chan, A. T. & Giovannucci, E. L. Primary Prevention of Colorectal Cancer. *Gastroenterology*  
768 **138**, 2029-2043.e10 (2010).
- 769 26. Chan, A. T. *et al.* Hemochromatosis gene mutations, body iron stores, dietary iron, and risk  
770 of colorectal adenoma in women. *Journal of the National Cancer Institute* **97**, 917–926  
771 (2005).
- 772 27. Ackerman, C. M., Lee, S. & Chang, C. J. Analytical Methods for Imaging Metals in Biology:  
773 From Transition Metal Metabolism to Transition Metal Signaling. *Anal. Chem.* **89**, 22–41  
774 (2017).
- 775 28. Janesick, A. *et al.* High resolution mapping of the tumor microenvironment using integrated  
776 single-cell, spatial and in situ analysis. *Nat Commun* **14**, 8353 (2023).
- 777 29. Roudeau, S., Carmona, A. & Ortega, R. Multimodal and multiscale correlative elemental  
778 imaging: From whole tissues down to organelles. *Current Opinion in Chemical Biology* **76**,  
779 102372 (2023).
- 780 30. Ståhl, P. L. *et al.* Visualization and analysis of gene expression in tissue sections by spatial  
781 transcriptomics. *Science* **353**, 78–82 (2016).
- 782 31. Stark, R., Grzelak, M. & Hadfield, J. RNA sequencing: the teenage years. *Nat Rev Genet*  
783 **20**, 631–656 (2019).
- 784 32. Berglund, E. *et al.* Spatial maps of prostate cancer transcriptomes reveal an unexplored  
785 landscape of heterogeneity. *Nat Commun* **9**, 2419 (2018).
- 786 33. Ji, A. L. *et al.* Multimodal Analysis of Composition and Spatial Architecture in Human  
787 Squamous Cell Carcinoma. *Cell* **182**, 497-514.e22 (2020).
- 788 34. Maynard, K. R. *et al.* Transcriptome-scale spatial gene expression in the human dorsolateral  
789 prefrontal cortex. *Nat Neurosci* **24**, 425–436 (2021).
- 790 35. Fawcner-Corbett, D. *et al.* Spatiotemporal analysis of human intestinal development at  
791 single-cell resolution. *Cell* **184**, 810-826.e23 (2021).
- 792 36. PALISI Pediatric Intensive Care Influenza (PICFLU) Investigators *et al.* Exuberant fibroblast  
793 activity compromises lung function via ADAMTS4. *Nature* **587**, 466–471 (2020).
- 794 37. Garcia-Alonso, L. *et al.* Mapping the temporal and spatial dynamics of the human  
795 endometrium in vivo and in vitro. *Nat Genet* **53**, 1698–1711 (2021).
- 796 38. Meylan, M. *et al.* Tertiary lymphoid structures generate and propagate anti-tumor antibody-  
797 producing plasma cells in renal cell cancer. *Immunity* **55**, 527-541.e5 (2022).
- 798 39. Paul, B. *et al.* An integrated mass spectrometry imaging and digital pathology workflow for  
799 objective detection of colorectal tumours by unique atomic signatures. *Chemical science* **12**,  
800 10321–10333 (2021).
- 801 40. Schaier, M. *et al.* Multiparametric Tissue Characterization Utilizing the Cellular Metallome  
802 and Immuno-Mass Spectrometry Imaging. *JACS Au* **3**, 419–428 (2023).
- 803 41. Lu, Y. *et al.* Integrative Co-Registration of Elemental Imaging and Histopathology for  
804 Enhanced Spatial Multimodal Analysis of Tissue Sections through TRACE.  
805 2024.03.06.583819 Preprint at <https://doi.org/10.1101/2024.03.06.583819> (2024).
- 806 42. Bobb, J. F., Claus Henn, B., Valeri, L. & Coull, B. A. Statistical software for analyzing the  
807 health effects of multiple concurrent exposures via Bayesian kernel machine regression.  
808 *Environ Health* **17**, 67 (2018).
- 809 43. Bobb, J. F. *et al.* Bayesian kernel machine regression for estimating the health effects of  
810 multi-pollutant mixtures. *Biostatistics* **16**, 493–508 (2015).

- 811 44. Levy, J. J. *et al.* Mixed Effects Machine Learning Models for Colon Cancer Metastasis  
812 Prediction using Spatially Localized Immuno-Oncology Markers. *Pac Symp Biocomput* **27**,  
813 175–186 (2022).
- 814 45. Levy, J. J. *et al.* Identification of Spatial Proteomic Signatures of Colon Tumor Metastasis: A  
815 Digital Spatial Profiling Approach. *Am J Pathol* S0002-9440(23)00123–2 (2023)  
816 doi:10.1016/j.ajpath.2023.02.020.
- 817 46. Srivastava, A. *et al.* Abstract 4949: Multimodal analysis of metals, spatial transcriptomics,  
818 and histological structures in colorectal cancer. *Cancer Research* **84**, 4949 (2024).
- 819 47. Lu, Y. *et al.* Abstract 7429: A web-based application to co-register elemental imaging with  
820 histopathology to enhance the study of metal bioaccumulation within tumors. *Cancer*  
821 *Research* **84**, 7429 (2024).
- 822 48. Getis, A. & Ord, J. K. The Analysis of Spatial Association by Use of Distance Statistics.  
823 *Geographical Analysis* **24**, 189–206 (1992).
- 824 49. D’Anna, G. *et al.* Copper homeostasis (WP3286) - Homo sapiens | WikiPathways.
- 825 50. Hanspers, K. *et al.* Epithelial to mesenchymal transition in colorectal cancer (WP4239) -  
826 Homo sapiens | WikiPathways.
- 827 51. Kutmon, M. *et al.* PathVisio 3: an extendable pathway analysis toolbox. *PLoS computational*  
828 *biology* **11**, e1004085 (2015).
- 829 52. Van Iersel, M. P. *et al.* Presenting and exploring biological pathways with PathVisio. *BMC*  
830 *Bioinformatics* **9**, 399 (2008).
- 831 53. Agrawal, A. *et al.* WikiPathways 2024: next generation pathway database. *Nucleic acids*  
832 *research* **52**, D679–D689 (2024).
- 833 54. Martens, M. *et al.* WikiPathways: connecting communities. *Nucleic acids research* **49**,  
834 D613–D621 (2021).
- 835 55. Blockhuys, S., Brady, D. C. & Wittung-Stafshede, P. Evaluation of copper chaperone  
836 ATOX1 as prognostic biomarker in breast cancer. *Breast Cancer* **27**, 505–509 (2020).
- 837 56. Pierson, H. *et al.* The function of ATPase copper transporter ATP7B in intestine.  
838 *Gastroenterology* **154**, 168–180 (2018).
- 839 57. Owatari, S. *et al.* Copper-transporting P-type ATPase, ATP7A, confers multidrug resistance  
840 and its expression is related to resistance to SN-38 in clinical colon cancer. *Cancer*  
841 *Research* **67**, 4860–4868 (2007).
- 842 58. Jong, N. N. & McKeage, M. J. Emerging roles of metal solute carriers in cancer mechanisms  
843 and treatment. *Biopharm & Drug Disp* **35**, 450–462 (2014).
- 844 59. Kamiya, T. Role of copper and SOD3-mediated extracellular redox regulation in tumor  
845 progression. *J Clin Biochem Nutr* **75**, 1–6 (2024).
- 846 60. Erdogan, B. *et al.* Cancer-associated fibroblasts promote directional cancer cell migration by  
847 aligning fibronectin. *Journal of Cell Biology* **216**, 3799–3816 (2017).
- 848 61. Chen, Y. *et al.* Cancer-associated fibroblasts impact the clinical outcome and treatment  
849 response in colorectal cancer via immune system modulation: a comprehensive genome-  
850 wide analysis. *Molecular Medicine* **27**, 139 (2021).
- 851 62. Drev, D. *et al.* Impact of fibroblast-derived SPARC on invasiveness of colorectal cancer  
852 cells. *Cancers* **11**, 1421 (2019).
- 853 63. Illemann, M. *et al.* MMP-9 is differentially expressed in primary human colorectal  
854 adenocarcinomas and their metastases. *Molecular Cancer Research* **4**, 293–302 (2006).
- 855 64. Yang, B. *et al.* Matrix metalloproteinase-9 overexpression is closely related to poor  
856 prognosis in patients with colon cancer. *World J Surg Onc* **12**, 24 (2014).
- 857 65. Velten, B. *et al.* Identifying temporal and spatial patterns of variation from multimodal data  
858 using MEFISTO. *Nat Methods* **19**, 179–186 (2022).
- 859 66. Hanisch, F.-G. O-Glycosylation of the Mucin Type. *Biological Chemistry* **382**, (2001).



- 860 67. Mihalache, A. *et al.* Structural characterization of mucin O-glycosylation may provide  
861 important information to help prevent colorectal tumor recurrence. *Frontiers in oncology* **5**,  
862 217 (2015).
- 863 68. Brockhausen, I. Mucin-type O -glycans in human colon and breast cancer: glycodynamics  
864 and functions. *EMBO Reports* **7**, 599–604 (2006).
- 865 69. Dimitrov, D. *et al.* LIANA+ provides an all-in-one framework for cell–cell communication  
866 inference. *Nature Cell Biology* 1–10 (2024).
- 867 70. Dang, Q. *et al.* Ferroptosis: a double-edged sword mediating immune tolerance of cancer.  
868 *Cell Death Dis* **13**, 1–16 (2022).
- 869 71. Huang, L., Li, W., Lu, Y., Ju, Q. & Ouyang, M. Iron metabolism in colorectal cancer. *Front*  
870 *Oncol* **13**, 1098501 (2023).
- 871 72. Hsu, M. Y., Mina, E., Roetto, A. & Porporato, P. E. Iron: an essential element of cancer  
872 metabolism. *Cells* **9**, 2591 (2020).
- 873 73. Han, H. S. *et al.* Presence of Iron in Colorectal Adenomas and Adenocarcinomas. *Gut Liver*  
874 **2**, 19–22 (2008).
- 875 74. Wang, Y., Pei, P., Yang, K., Guo, L. & Li, Y. Copper in colorectal cancer: From copper-  
876 related mechanisms to clinical cancer therapies. *Clin Transl Med* **14**, e1724 (2024).
- 877 75. Lv, M. *et al.* Manganese is critical for antitumor immune responses via cGAS-STING and  
878 improves the efficacy of clinical immunotherapy. *Cell Research* **30**, 966–979 (2020).
- 879 76. Li, J. *et al.* Manganese Coordination Micelles That Activate Stimulator of Interferon Genes  
880 and Capture In Situ Tumor Antigens for Cancer Metalloimmunotherapy. *ACS Nano* **16**,  
881 16909–16923 (2022).
- 882 77. Nasu, T., Koshiba, H., Mase, K. & Ishida, Y. Mechanism of inhibition of contraction by  
883 cadmium in guinea-pig taenia coli. *Journal of Pharmacy and Pharmacology* **35**, 505–510  
884 (1983).
- 885 78. Patterson, N. H. *et al.* Next Generation Histology-Directed Imaging Mass Spectrometry  
886 Driven by Autofluorescence Microscopy. *Anal. Chem.* **90**, 12404–12413 (2018).
- 887 79. Henderson, G. S., De Groot, F. M. & Moulton, B. J. X-ray absorption near-edge structure  
888 (XANES) spectroscopy. *Reviews in Mineralogy and Geochemistry* **78**, 75–138 (2014).
- 889 80. Rehr, J. J. & Ankudinov, A. L. Progress in the theory and interpretation of XANES.  
890 *Coordination Chemistry Reviews* **249**, 131–140 (2005).
- 891 81. Löhr, K., Borovinskaya, O., Tourniaire, G., Panne, U. & Jakubowski, N. Arraying of single  
892 cells for quantitative high throughput laser ablation ICP-TOF-MS. *Analytical chemistry* **91**,  
893 11520–11528 (2019).
- 894 82. Singh, H. *et al.* Visium CytAssist: A Novel Platform for Spatial Transcriptomic Analysis of  
895 FFPE Sections Mounted on Standard Glass Slides. in *MOLECULAR THERAPY* vol. 30  
896 589–590 (CELL PRESS 50 HAMPSHIRE ST, FLOOR 5, CAMBRIDGE, MA 02139 USA,  
897 2022).
- 898 83. McInnes, L., Healy, J., Saul, N. & Großberger, L. UMAP: Uniform Manifold Approximation  
899 and Projection. *Journal of Open Source Software* **3**, 861 (2018).
- 900 84. Traag, V. A., Waltman, L. & Van Eck, N. J. From Louvain to Leiden: guaranteeing well-  
901 connected communities. *Scientific reports* **9**, 1–12 (2019).
- 902 85. Elmentaite, R. *et al.* Cells of the human intestinal tract mapped across space and time.  
903 *Nature* **597**, 250–255 (2021).
- 904 86. Gayoso, A. *et al.* A Python library for probabilistic analysis of single-cell omics data. *Nature*  
905 *biotechnology* **40**, 163–166 (2022).
- 906 87. Xu, C. *et al.* Probabilistic harmonization and annotation of single-cell transcriptomics data  
907 with deep generative models. *Molecular Systems Biology* **17**, e9620 (2021).
- 908 88. Kleshchevnikov, V. *et al.* Cell2location maps fine-grained cell types in spatial  
909 transcriptomics. *Nat Biotechnol* **40**, 661–671 (2022).

- 910 89. Kiryati, N., Eldar, Y. & Bruckstein, A. M. A probabilistic Hough transform. *Pattern recognition*  
911 **24**, 303–316 (1991).
- 912 90. Weickert, J. *Anisotropic Diffusion in Image Processing*. vol. 1 (Teubner Stuttgart, 1998).
- 913 91. Marconato, L. *et al.* SpatialData: an open and universal data framework for spatial omics.  
914 *Nature Methods* 1–5 (2024) doi:10.1038/s41592-024-02212-x.
- 915 92. Bankhead, P. *et al.* QuPath: Open source software for digital pathology image analysis. *Sci*  
916 *Rep* **7**, 1–7 (2017).
- 917 93. Bredikhin, D., Kats, I. & Stegle, O. MUON: multimodal omics analysis framework. *Genome*  
918 *Biology* **23**, 42 (2022).
- 919 94. Rey, S. J. & Anselin, L. PySAL: A Python Library of Spatial Analytical Methods. in *Handbook*  
920 *of Applied Spatial Analysis* (eds. Fischer, M. M. & Getis, A.) 175–193 (Springer Berlin  
921 Heidelberg, Berlin, Heidelberg, 2010). doi:10.1007/978-3-642-03647-7\_11.
- 922 95. Lenth, R. V. *et al.* emmeans: Estimated Marginal Means, aka Least-Squares Means. (2023).
- 923 96. Blighe, K., Rana, S. & Lewis, M. EnhancedVolcano: Publication-ready volcano plots with  
924 enhanced colouring and labeling. *R package version 1*, 10–18129 (2019).
- 925 97. Chen, E. Y. *et al.* Enrichr: interactive and collaborative HTML5 gene list enrichment analysis  
926 tool. *BMC Bioinformatics* **14**, 128 (2013).
- 927 98. Schubert, M. *et al.* Perturbation-response genes reveal signaling footprints in cancer gene  
928 expression. *Nature communications* **9**, 20 (2018).
- 929 99. Badia-i-Mompel, P. *et al.* decoupleR: ensemble of computational methods to infer biological  
930 activities from omics data. *Bioinformatics Advances* **2**, vbac016 (2022).
- 931
- 932
- 933

934 **Supplementary Materials**  
 935  
 936 **Supplementary Figures**  
 937

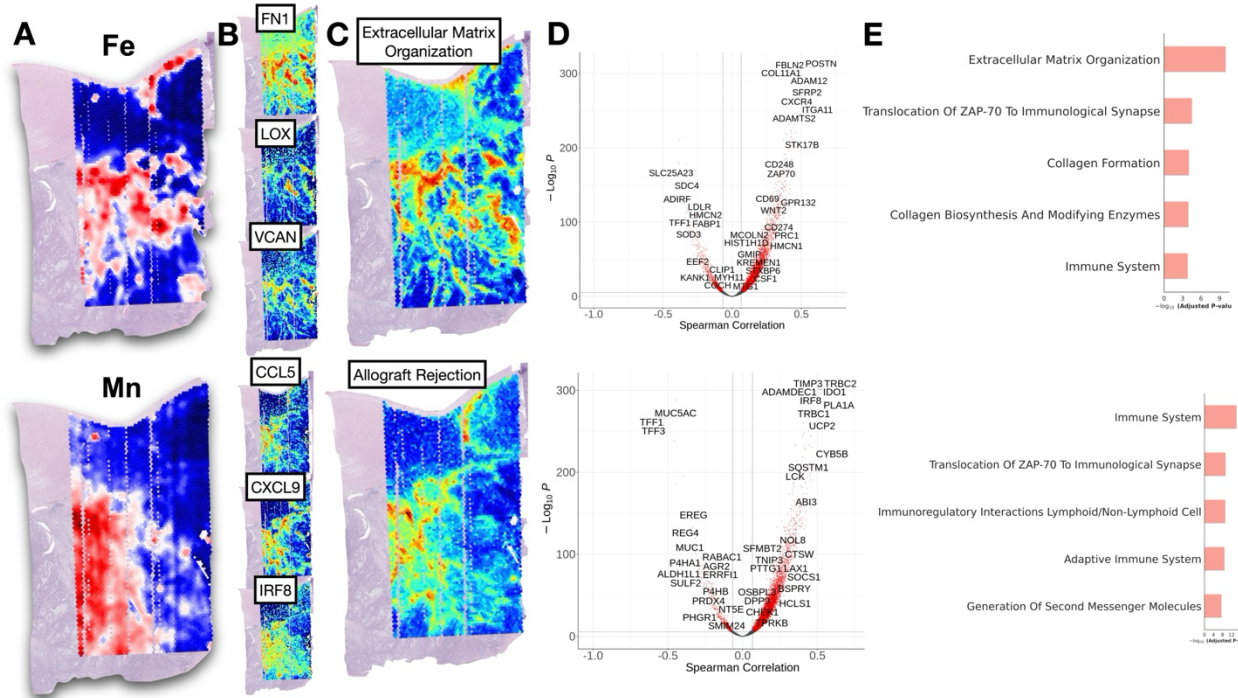

938 **Figure S1: Additional Metals-Based Pathway Findings Based on Spatial Transcriptomics**  
 939 **Correlation with Fe and Mn Distribution: A)** Fe and Mn  $G_i^*$  hotspot statistics, **B)** Visualization  
 940 of spatial distribution of Fe-related (FN1, LOX, VCAN) and Mn-related (CCL5, CXCL9, IRF8)  
 941 gene expression demonstrating association with respective elements, **C)** Visualization of  
 942 Extracellular Matrix Organization and Allograft Rejection (reflects anti-cancer immune response)  
 943 through aggregating gene expression across pathway compared to a background distribution,  
 944 again found to be associated with respective elements, **D)** Volcano plot mapping spearman  
 945 correlation between 18074 genes and  $G_i^*$  statistics for respective metals on x-axis and  $-\log_{10}(p$ -  
 946 values) on y-axis– p-value and correlation cutoffs were set at 0.05/18074; **E)** Pathways  
 947 associated with respective elements (Reactome pathways)  
 948  
 949

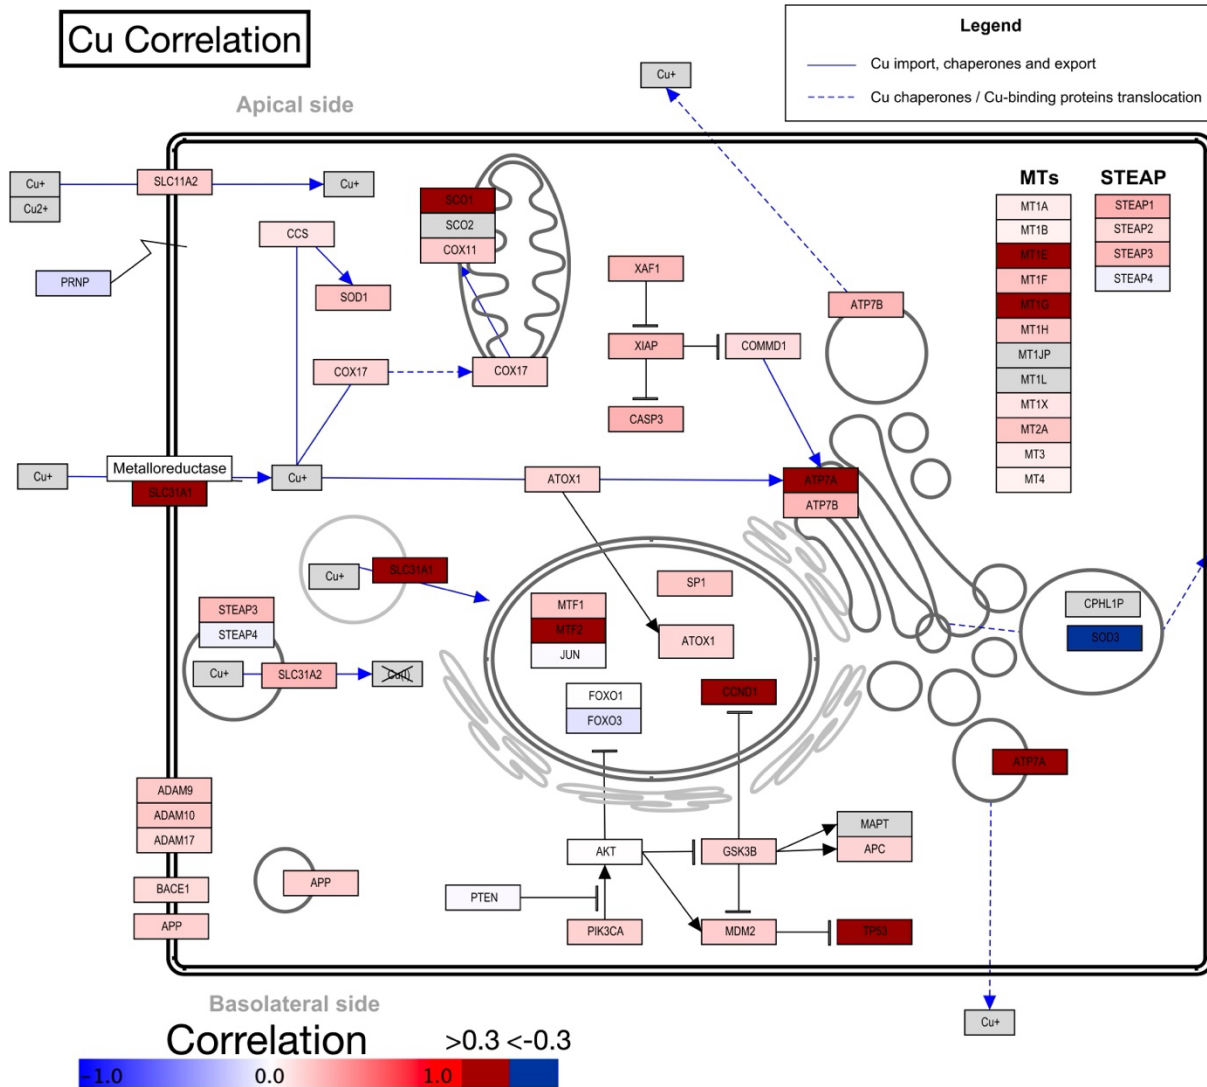

950  
 951 **Figure S2: Visualization of Cu Differential Expression Results Overlaid on Cu**  
 952 **Homeostasis Pathway Diagram:** Color of each gene reflects positive (red) and negative (blue)  
 953 correlations with Cu distribution; correlations with magnitude exceeding 0.3 are denoted using  
 954 dark red/blue



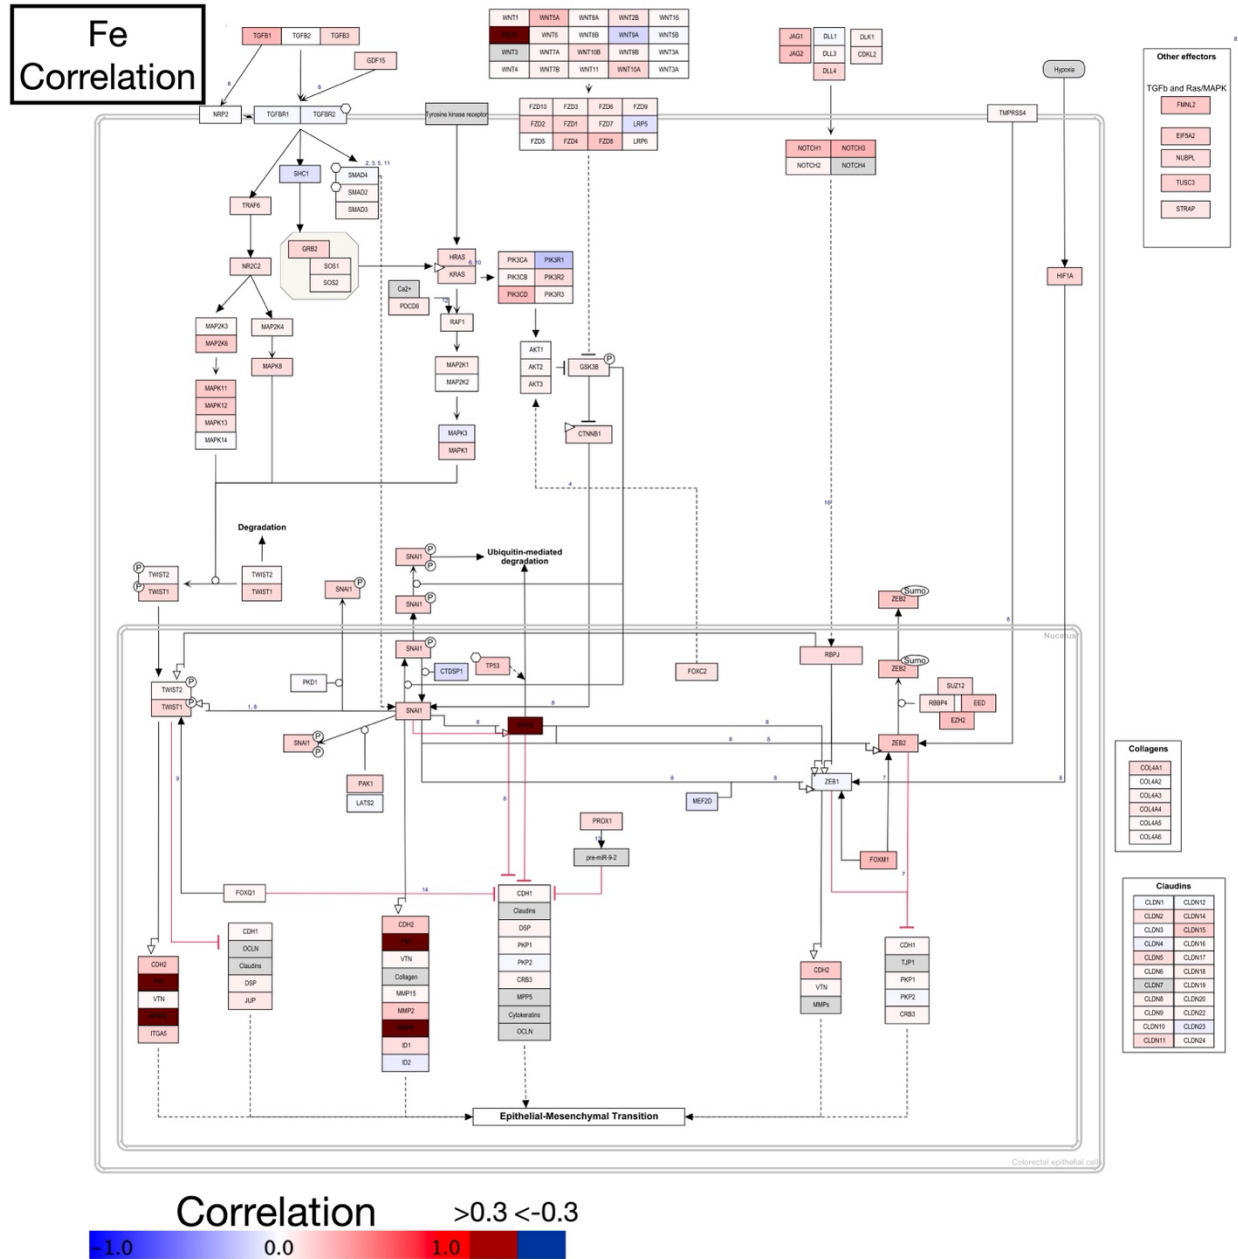

955  
956  
957  
958  
959  
960

**Figure S3: Visualization of Fe Differential Expression Results Overlaid on Epithelial-to-Mesenchymal Pathway Diagram:** Color of each gene reflects positive (red) and negative (blue) correlations with Cu distribution; correlations with magnitude exceeding 0.3 are denoted using dark red/blue

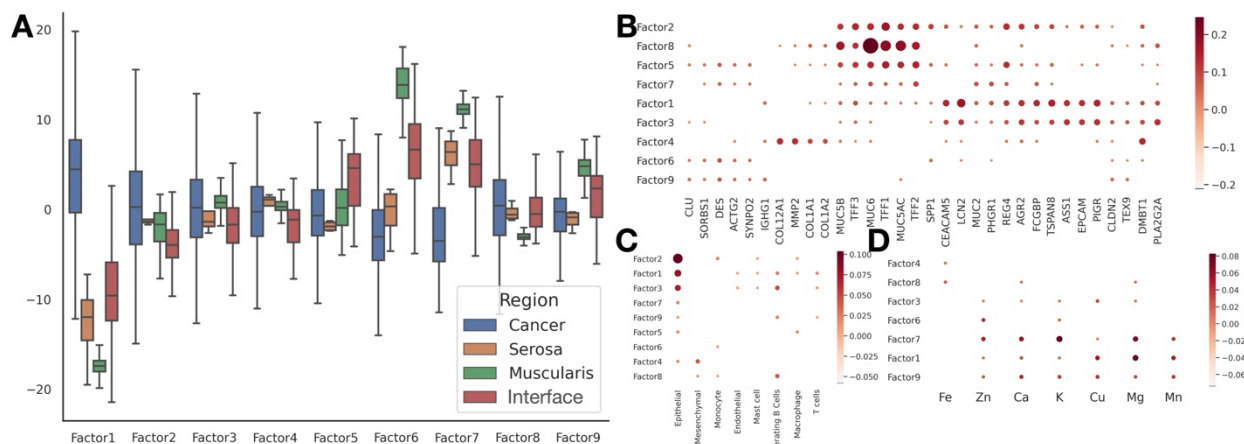

961  
 962 **Figure S4: Further Factor Analysis Associations, broken down by: A) Tissue architecture**  
 963 **(average loading), B) Gene expression (factor coefficients), C) cell type (factor coefficients), D)**  
 964 **element (factor coefficients)**  
 965

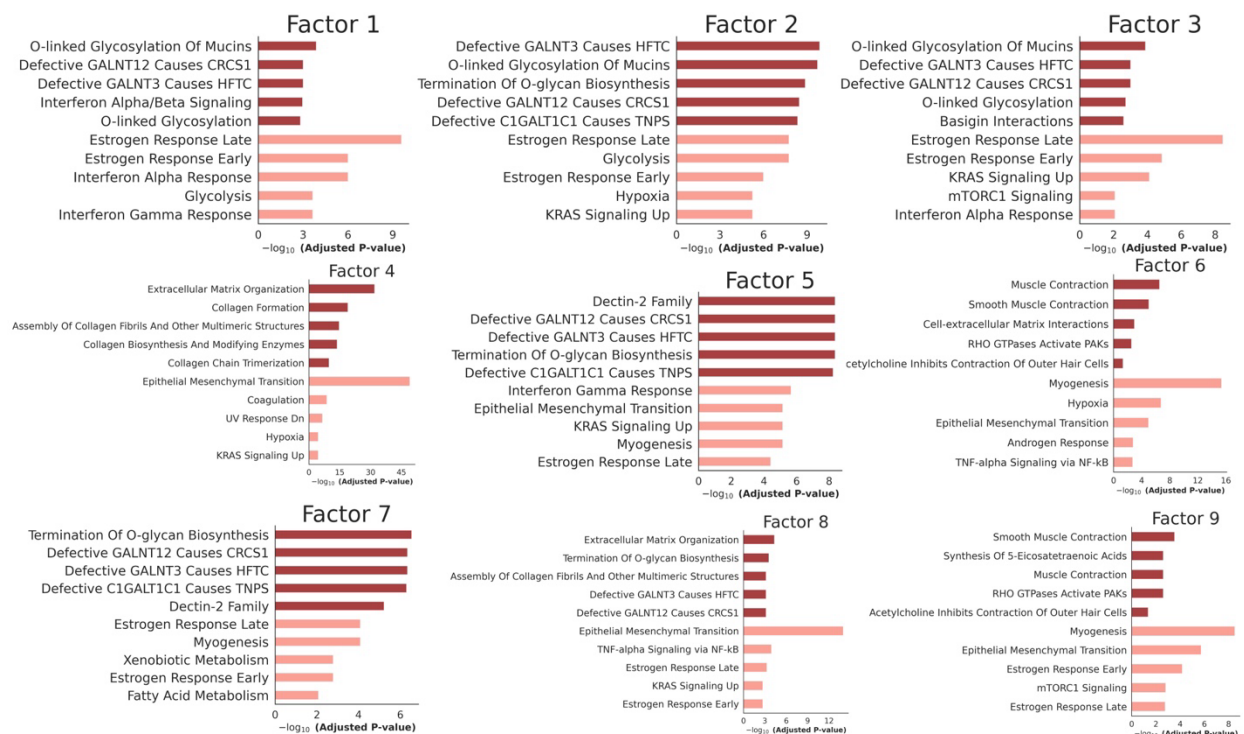

966  
 967 **Figure S5: Association of Spatial Factors with Biological Pathways from Reactome (Dark**  
 968 **Red) and MsigDB Cancer Hallmarks (Salmon)**

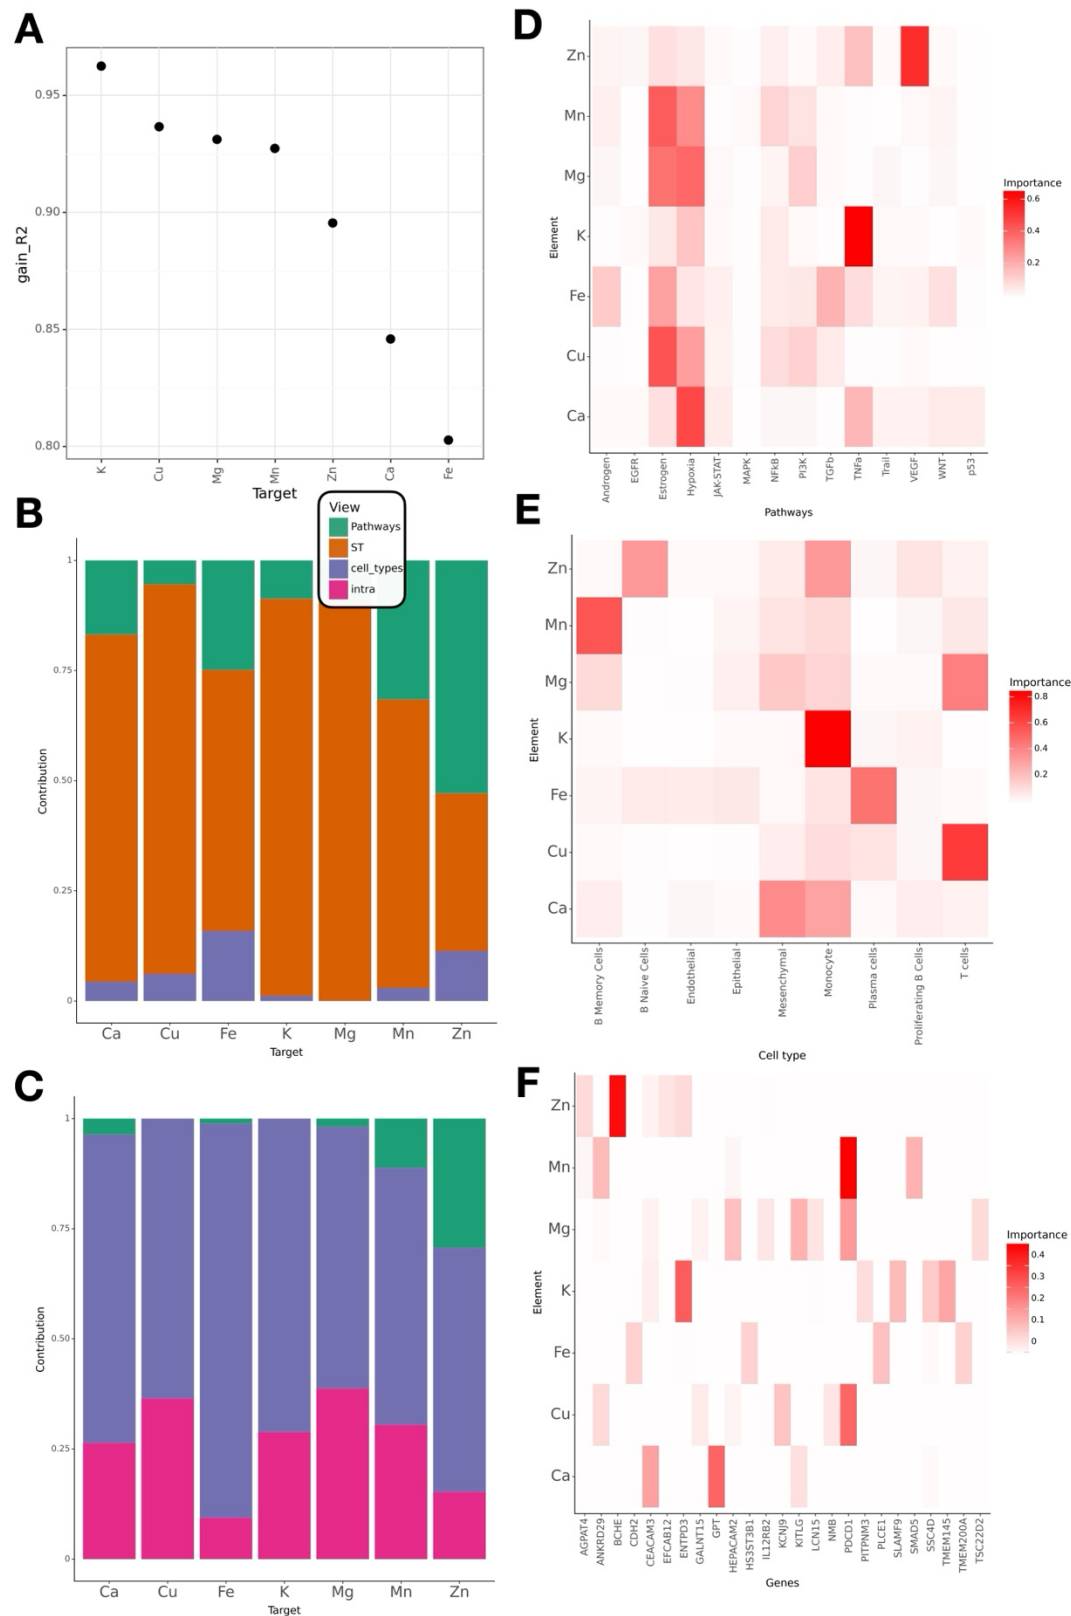

969  
 970 **Figure S6: Elemental Distribution and Variance Explained via MISTy: A)** Ability to predict  
 971 various elements by ST data types alone via  $R^2$ , **B)** Breakdown of  $R^2$  by data type, **C)**

972 Breakdown of  $R^2$  by data type when including other elements, **D-F)** Spatially informative  
973 features, specific to each element, broken down by **D)** Pathway, **E)** Cell type, **F)** Gene  
974

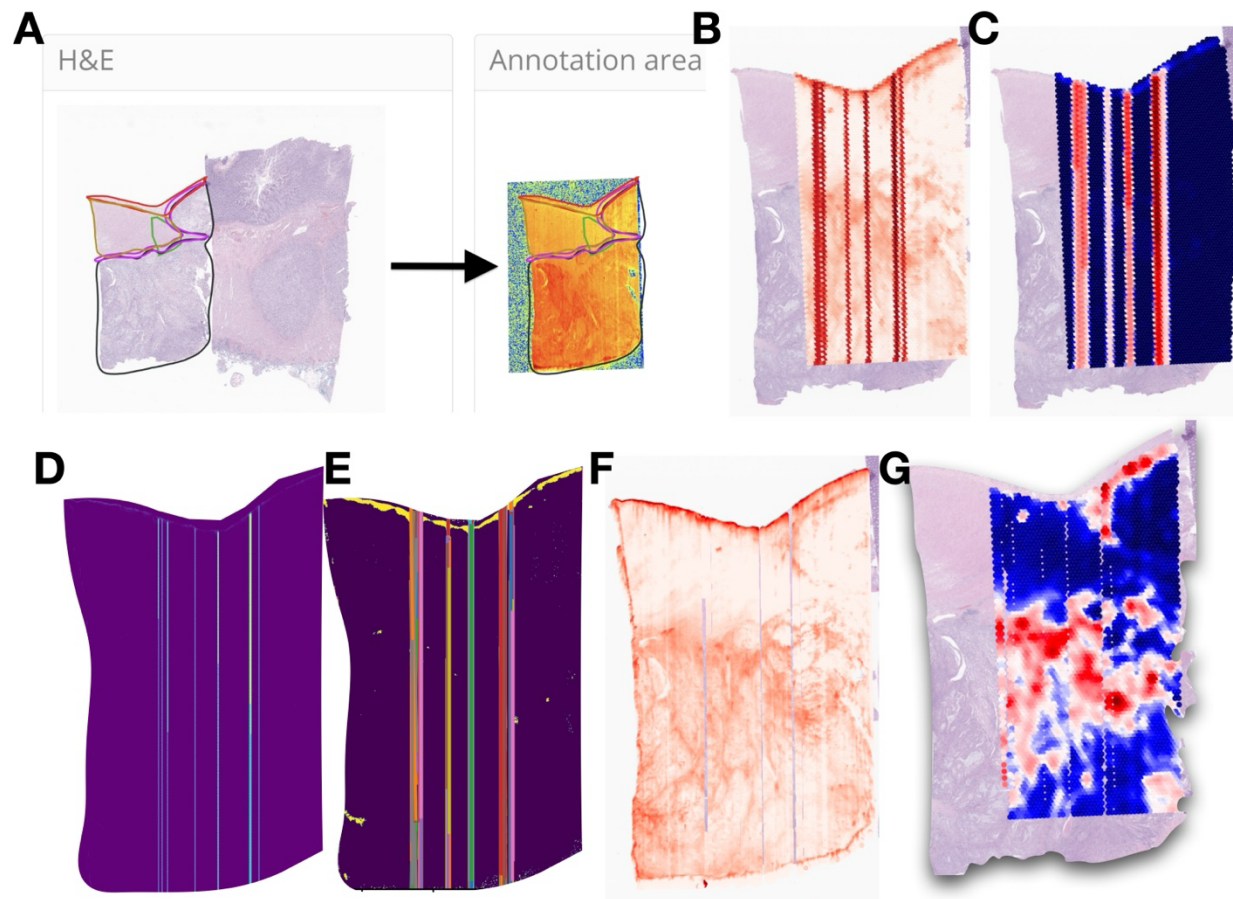

975  
976 **Figure S7: Preprocessing Workflow:** **A)** Elemental maps are co-registered to ST-associated  
977 H&E WSI via TRACE, **B)** Vertical strip artifacts in Fe are **C)** confounding hotspot analysis and  
978 they are removed through **D)** anisotropic diffusion filtering, followed by **E)** hough transform for  
979 line detection. **F)** Elemental image after removing strip artifact. **G)** Removal of edge  
980 bleeding/washout artifact through binary erosion, aggregation of elemental abundance to ST  
981 spot level, and derivation of  $G_i^*$  hotspot statistics

982  
983 **Supplementary Tables**

984  
985 **Table S1:** Association of elemental abundance with architecture (one versus rest), includes  
986 average  $G^*$  spot-level statistics by architecture and marginal mean calculated through  
987 regression modeling along with statistical significance (see TableS1.xlsx)

988  
989 **Table S2:** Association of elemental abundance with pairwise relative differences between  
990 architectures, includes marginal mean comparisons calculated through regression modeling  
991 along with statistical significance (see TableS2.xlsx)

992

993 **Table S3:** Association of elemental abundance with cell-type, includes spearman correlations  
994 and p-values (see TableS3.xlsx)  
995

996 **Table S4:** Differential expression analysis results, includes spearman correlation, p-values and  
997 Bonferroni-adjusted p-values by Element (see TableS4.xlsx)  
998

999 **Table S5:** Pathway analysis findings (Reactome, Hallmarks) for top 150 genes tied to higher  
1000 elemental abundance, ranked by z-statistic (see TableS5.xlsx)  
1001

1002 **Table S6:** Pathway analysis findings (Reactome, Hallmarks) for top 150 genes tied to lower  
1003 elemental abundance, ranked by z-statistic (see TableS6.xlsx)  
1004

1005 **Table S7:** Pathway analysis findings (Reactome, Hallmarks) for top 150 genes tied to higher  
1006 and lower elemental abundance, ranked by magnitude of z-statistic (see TableS7.xlsx)  
1007

1008 **Table S8:** Composition of spatial factors, MEFISTO factor analysis weights by top 10 genes,  
1009 cell-types and elements (see TableS8.xlsx)  
1010

1011 **Table S9:** Association of spatial factors with architecture (one versus rest), includes averaged  
1012 factor loadings by architecture and marginal mean calculated through regression modeling  
1013 along with statistical significance (see TableS9.xlsx)  
1014

1015 **Table S10:** Association of spatial factors with pairwise relative differences between  
1016 architectures, includes marginal mean comparisons calculated through regression modeling  
1017 along with statistical significance (see TableS10.xlsx)  
1018

1019 **Table S11:** MISTy performance statistics and feature importances, includes metal abundance  
1020 prediction performance broken down by data type (cell type information, spatial transcriptomics,  
1021 pathways, metals/intra-view) with and without inclusion of other metals in model and Gini-index  
1022 of features by data type (see TableS11.xlsx)  
1023  
1024  
1025  
1026  
1027  
1028  
1029  
1030
